# Supplementary material for: Genome-wide association study of MRI markers of cerebral small vessel disease in 42,310 participants
Source: PubMed Central journal article supplement (PMC7195435; doi:10.1038/s41467-020-15932-3), 2020-05-01
Supplement: 41467_2020_15932_MOESM10_ESM.pdf [file 41467_2020_15932_MOESM10_ESM.pdf]

Genome-wide association study of MRI markers of cerebral small  
vessel disease in 42310 participants

Persyn et al.

# Supplementary Figures

|                                                                                                             |    |
|-------------------------------------------------------------------------------------------------------------|----|
| Supplementary Figure 1. QQ plot for WMH GWAS in UK Biobank.....                                             | 4  |
| Supplementary Figure 2. Regional plots of WMH significant association results.....                          | 14 |
| Supplementary Figure 3. Comparison between European and trans-ethnic results for WMH reported top SNPs.. .. | 15 |
| Supplementary Figure 4. PCA correlation plots.....                                                          | 16 |
| Supplementary Figure 5. QQ plot for FA GWAS in UK Biobank.....                                              | 17 |
| Supplementary Figure 6. QQ plot for MD GWAS in UK Biobank.....                                              | 18 |
| Supplementary Figure 7. Regional plots of FA significant association results. ....                          | 23 |
| Supplementary Figure 8. Regional plots of MD significant association results.....                           | 27 |
| Supplementary Figure 9. Association results in the different brain regions.....                             | 28 |
| Supplementary Figure 10. Genetic correlation results with CSVD comorbidities.....                           | 29 |
| Supplementary Figure 11. Tissue enrichment in WMH GWAS meta-analysis summary statistics.....                | 30 |
| Supplementary Figure 12. Tissue enrichment in FA GWAS summary statistics.....                               | 31 |
| Supplementary Figure 13. Tissue enrichment in MD GWAS summary statistics. ....                              | 32 |
| Supplementary Figure 14. Graph of individuals for PCA on WMH dataset. ....                                  | 33 |
| Supplementary Figure 15. Graph of individuals for PCA on FA dataset. ....                                   | 34 |
| Supplementary Figure 16. Graph of individuals for PCA on MD dataset.....                                    | 35 |

# Supplementary Tables

|                                                                                                                    |    |
|--------------------------------------------------------------------------------------------------------------------|----|
| Supplementary Table 1. PCA eigenvalues and explained percentages of variance for FA and MD measure derivation..... | 36 |
| Supplementary Table 2. GO enrichment analysis.....                                                                 | 37 |
| Supplementary Table 3. Contribution of cardiovascular risk factors to WMH measure in UK Biobank population.....    | 38 |
| Supplementary Table 4. Mouse brain cell-type enrichment analysis. ....                                             | 39 |
| Supplementary Table 5. Removed field codes description.....                                                        | 40 |
| Supplementary Table 6. Sample quality control description. ....                                                    | 41 |
| Supplementary Table 7. UK Biobank field codes to derive covariates. ....                                           | 42 |
| Supplementary Table 8. Covariate description.....                                                                  | 43 |
| Supplementary Table 9. Description of covariates in relation to WMH, FA and MD phenotypes .....                    | 44 |

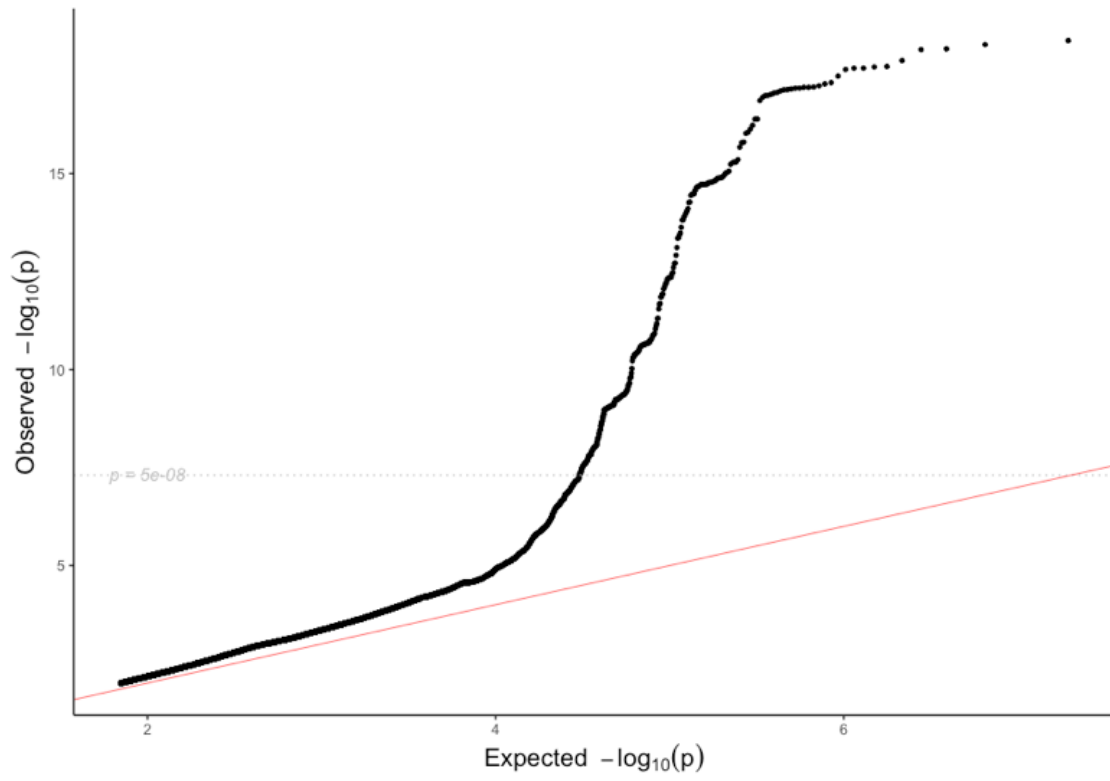

Supplementary Figure 1. QQ plot for WMH GWAS in UK Biobank.

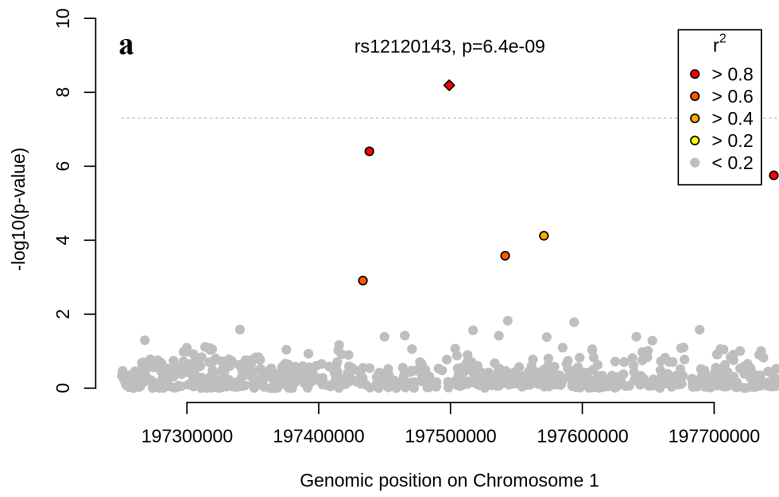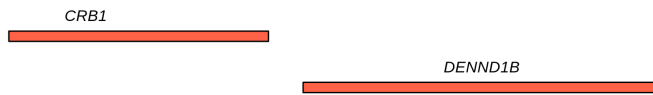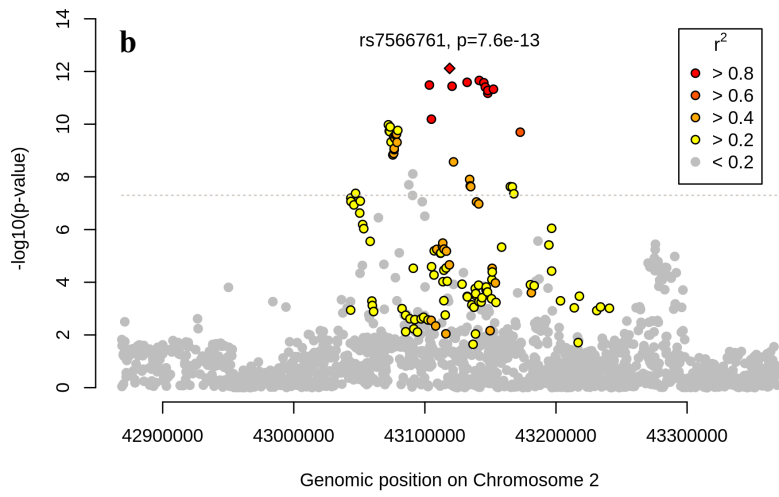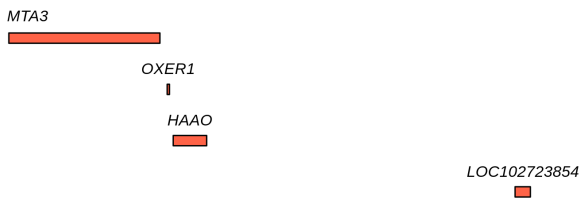

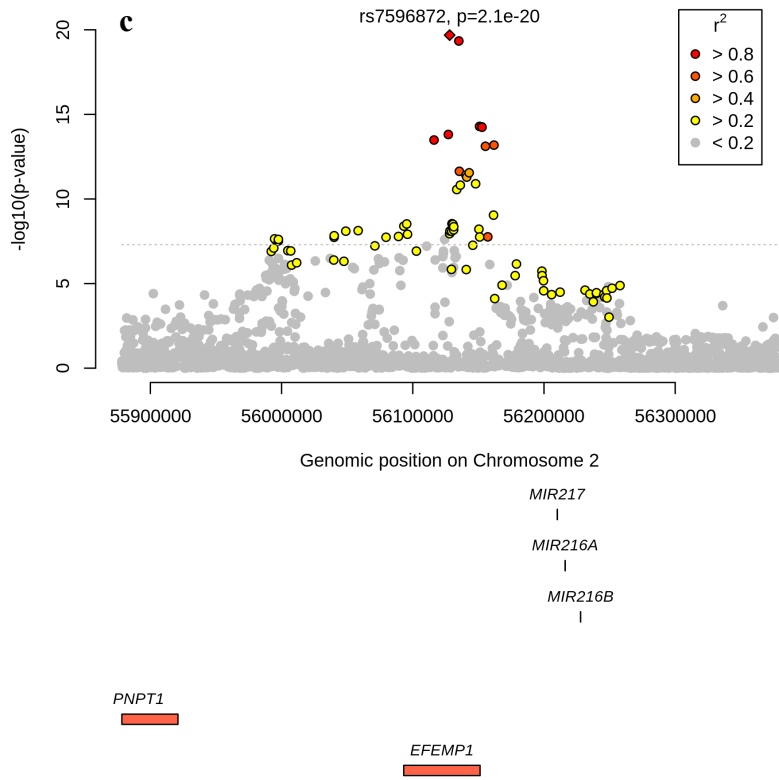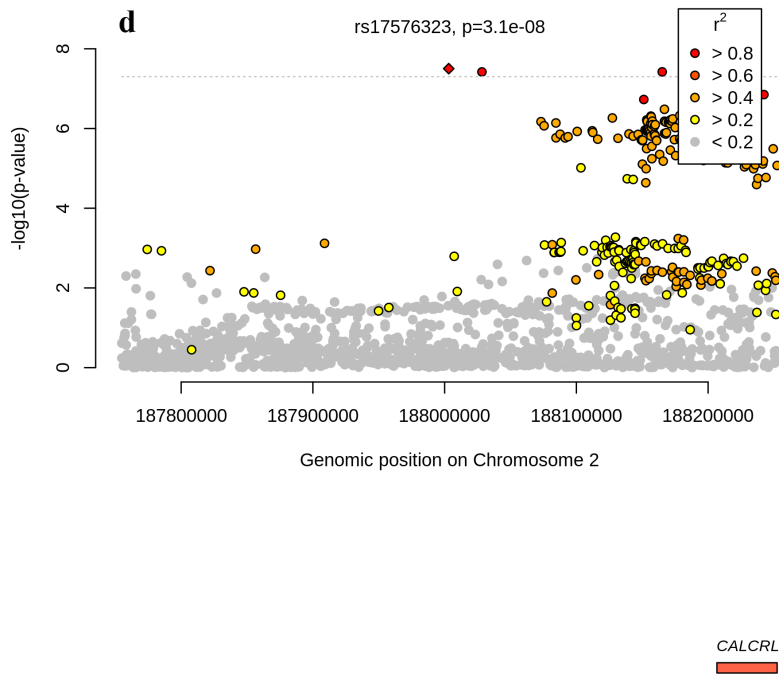

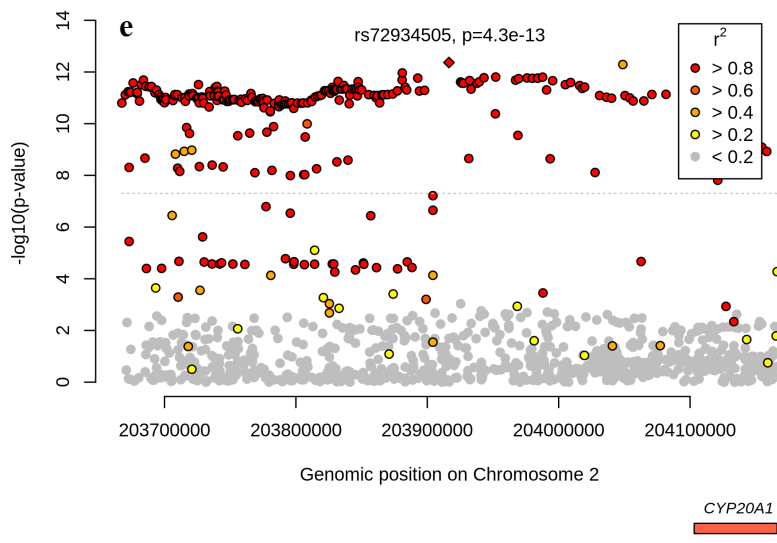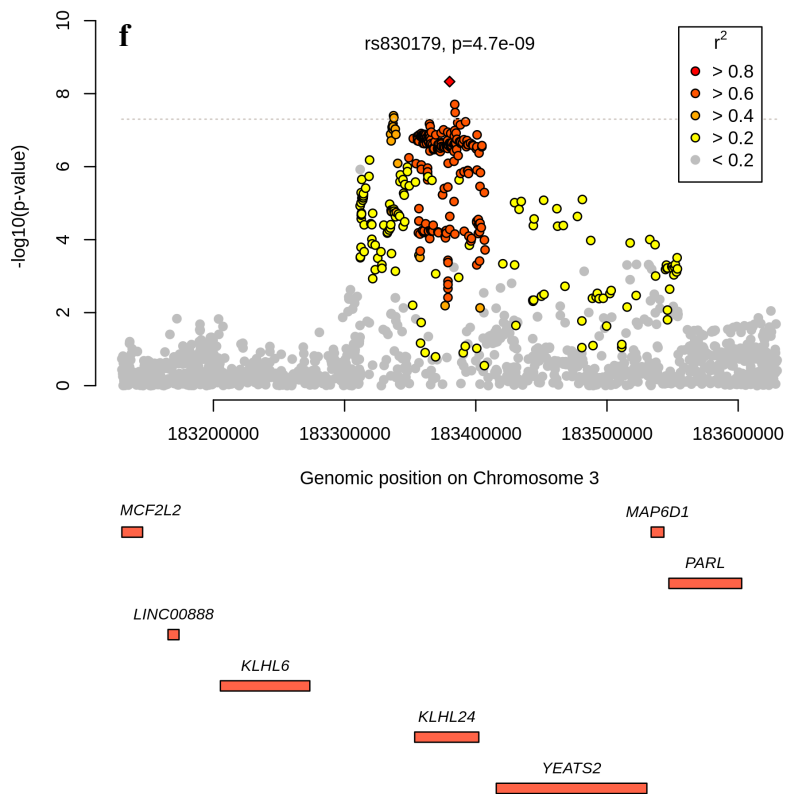

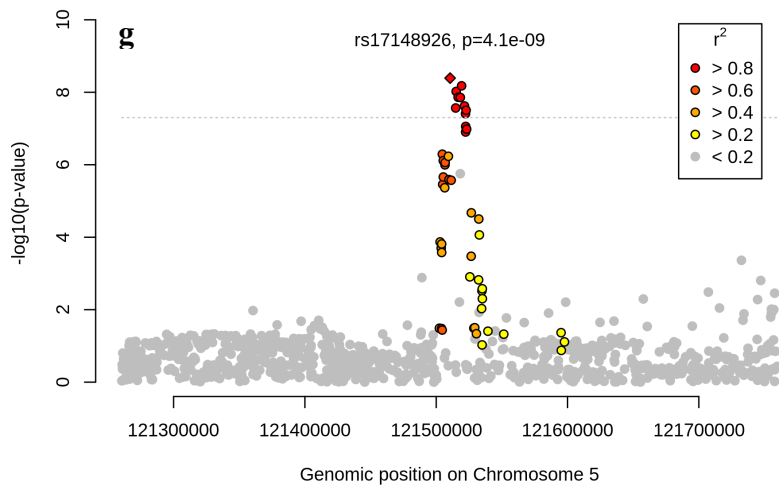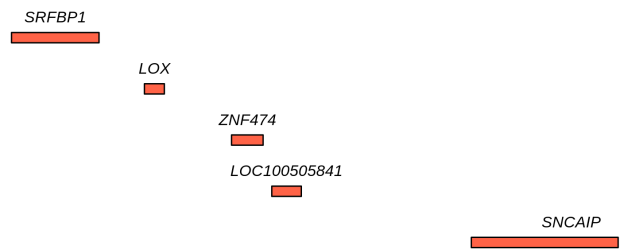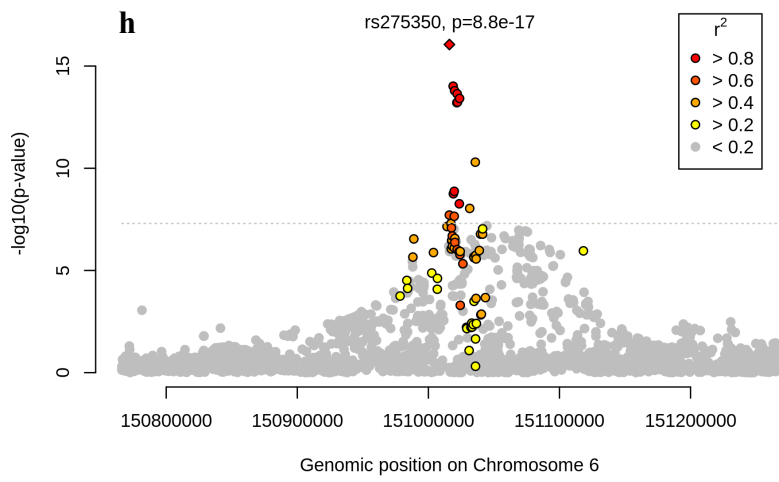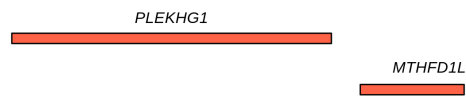



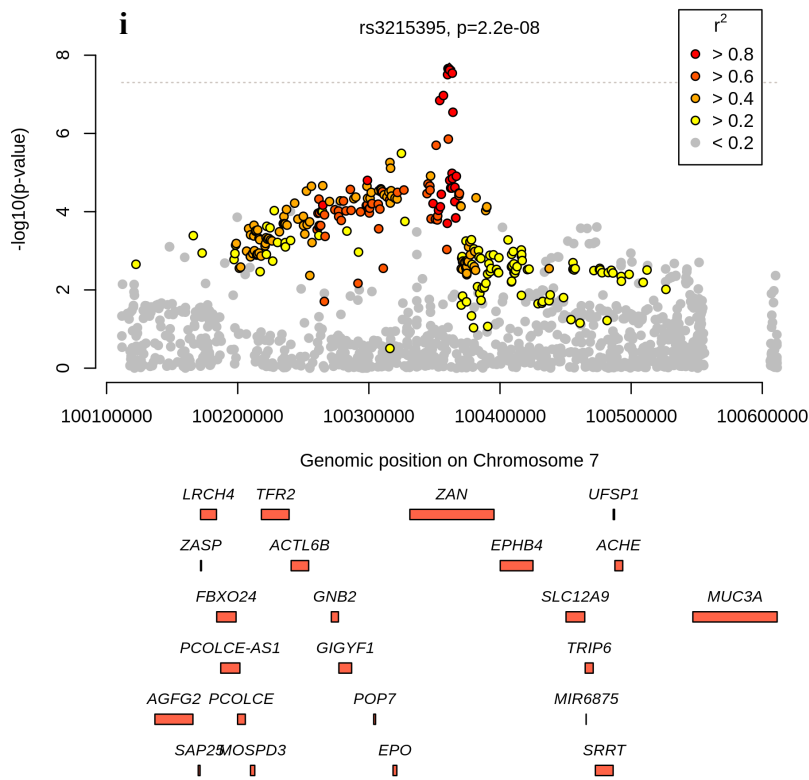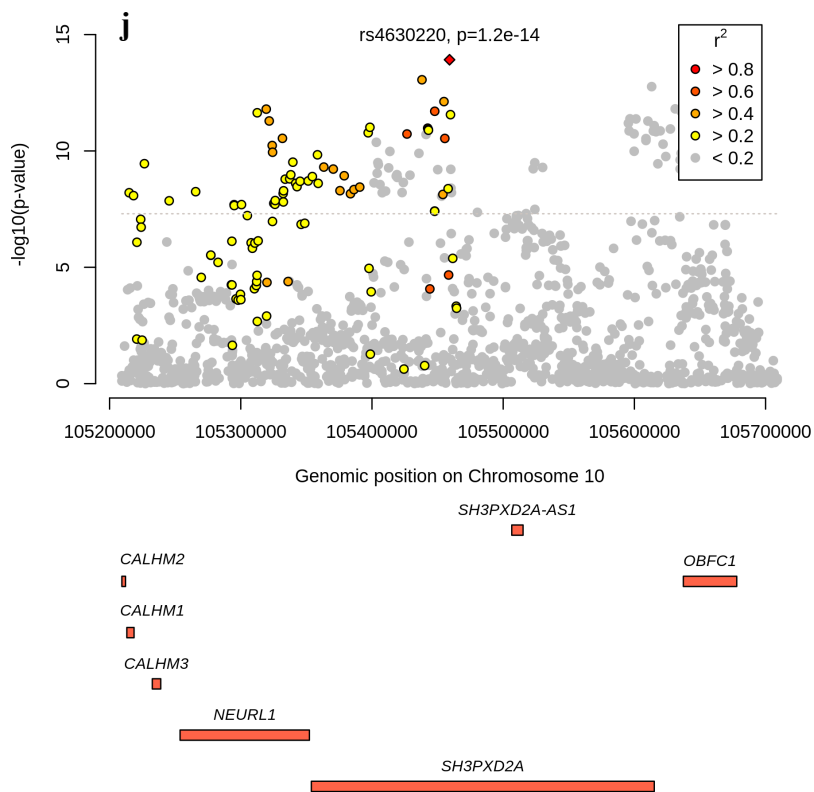

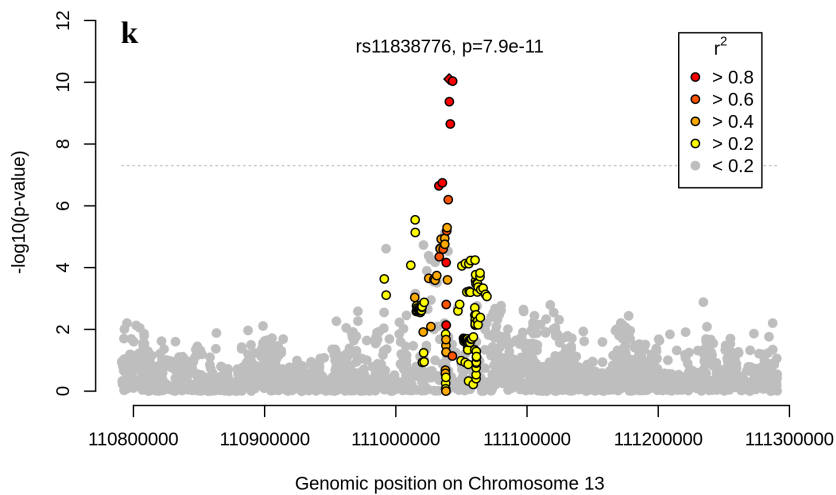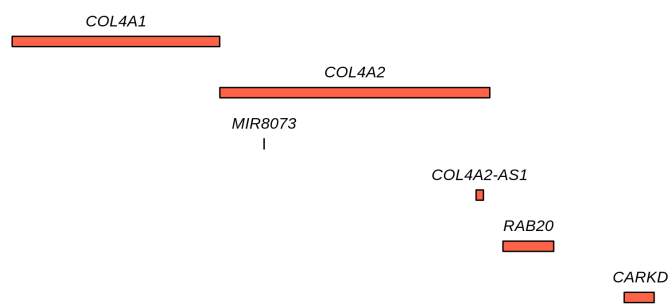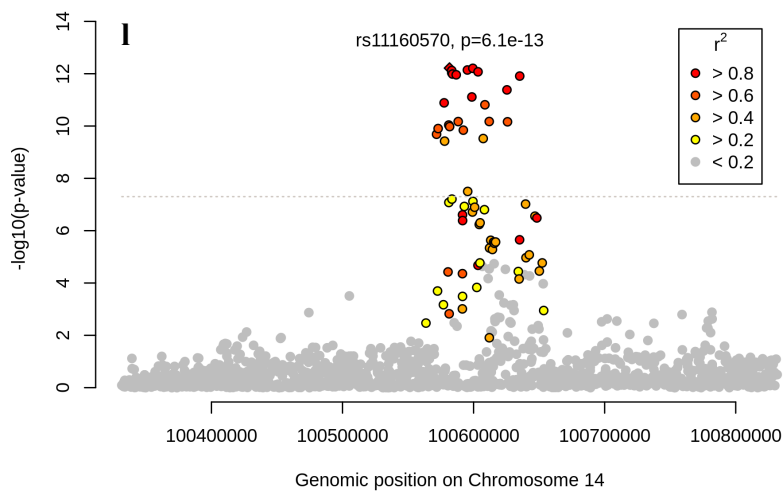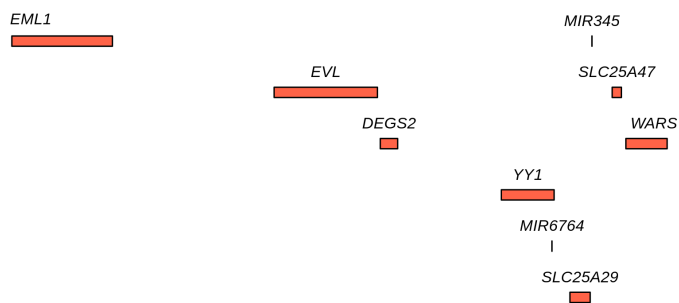

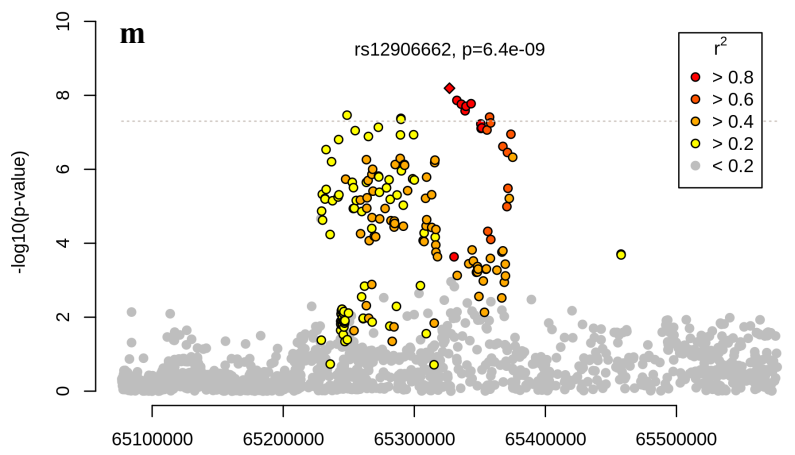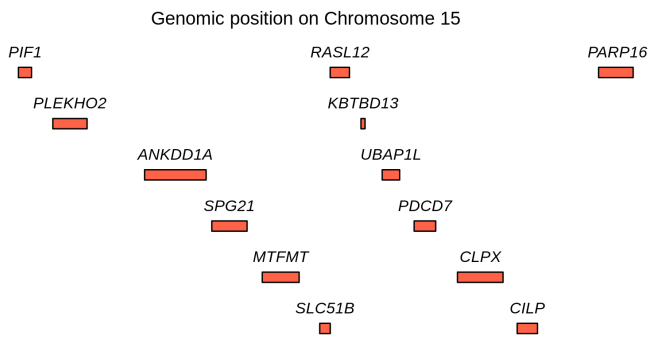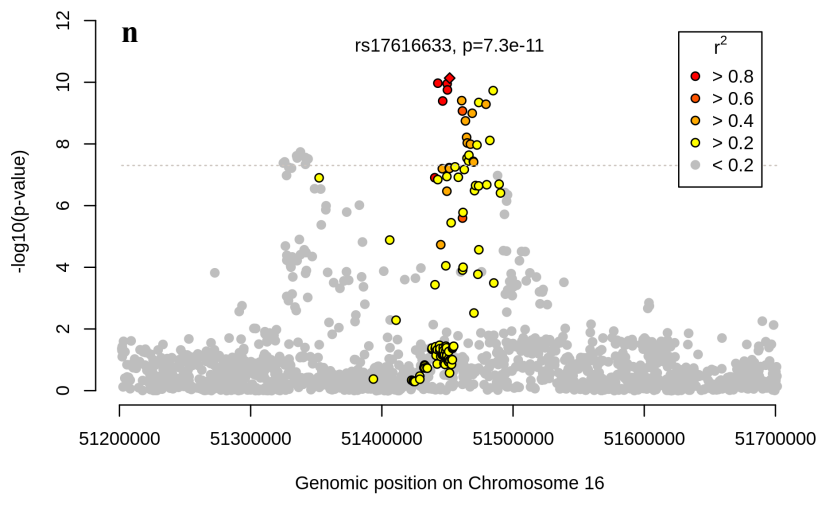

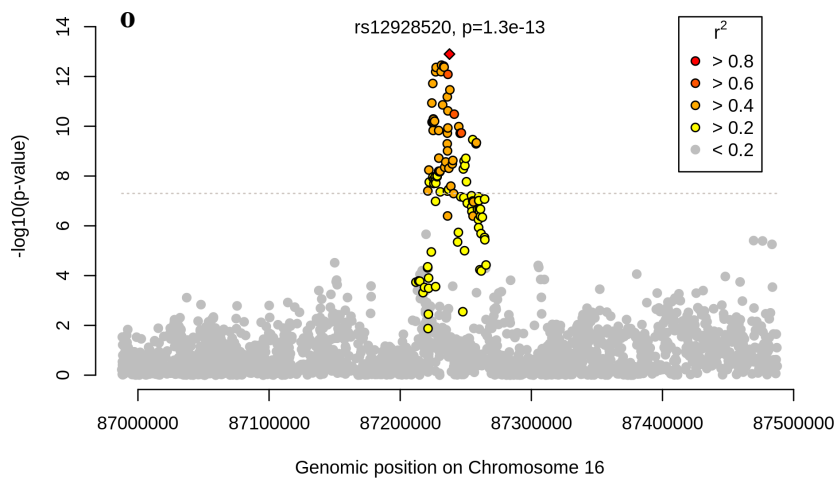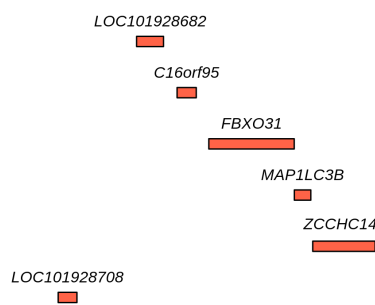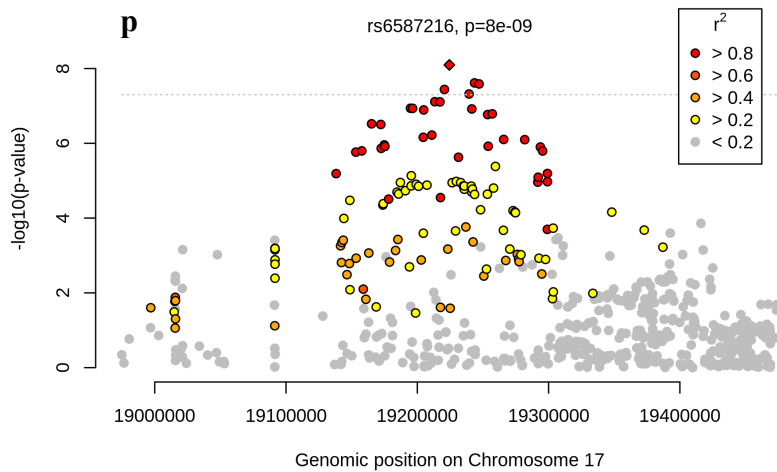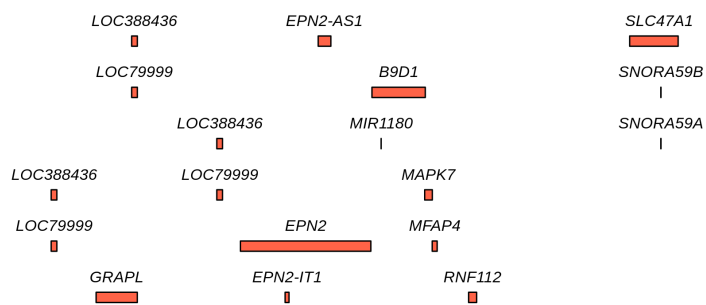

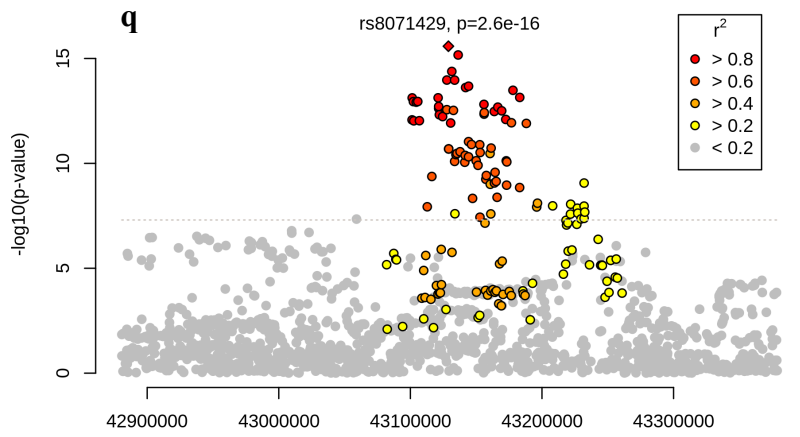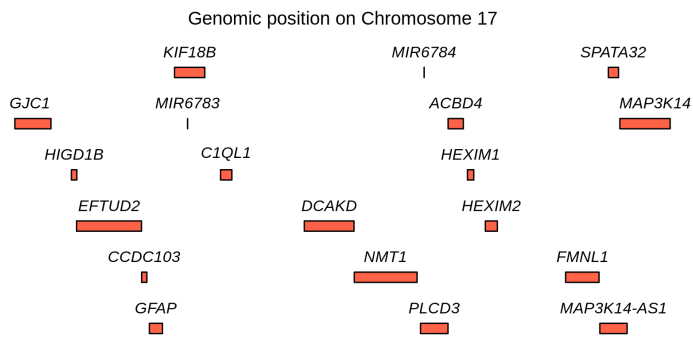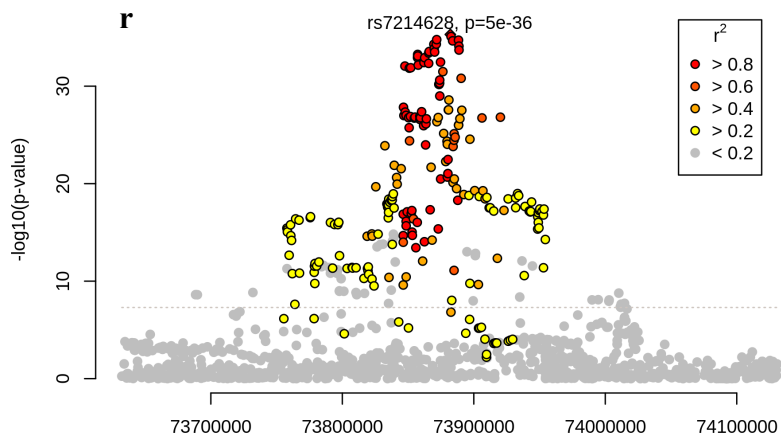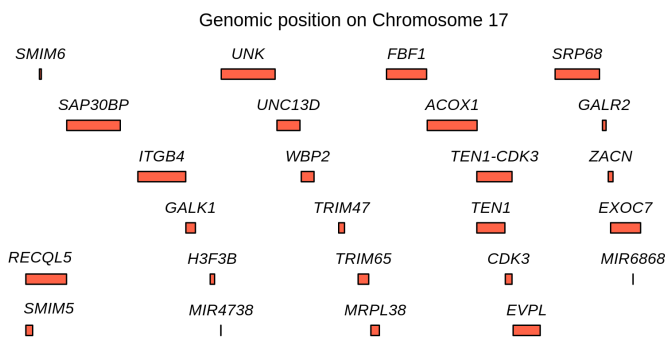

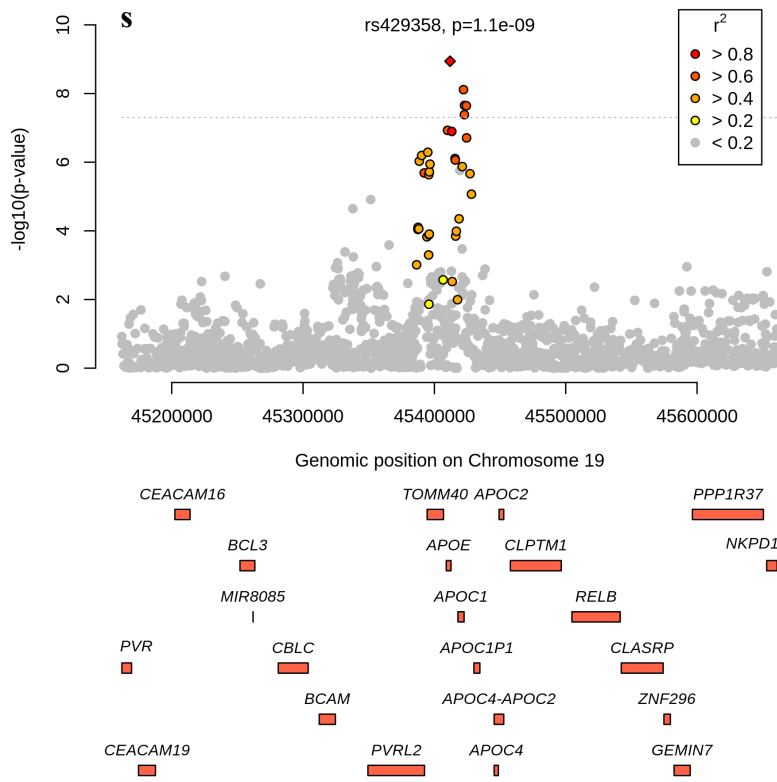

Supplementary Figure 2. Regional plots of WMH significant association results. The different panels correspond to the following top SNPs: **a.** rs12120143, **b.** rs7566761, **c.** rs7596872, **d.** rs17576323, **e.** rs72934505, **f.** rs830179, **g.** rs17148926, **h.** rs275350, **i.** rs3215395, **j.** rs4630220, **k.** rs11838776, **l.** rs11160570, **m.** rs12906662, **n.** rs17616633, **o.** rs12928520, **p.** rs6587216, **q.** rs8071429, **r.** rs7214628 and **s.** rs429358.

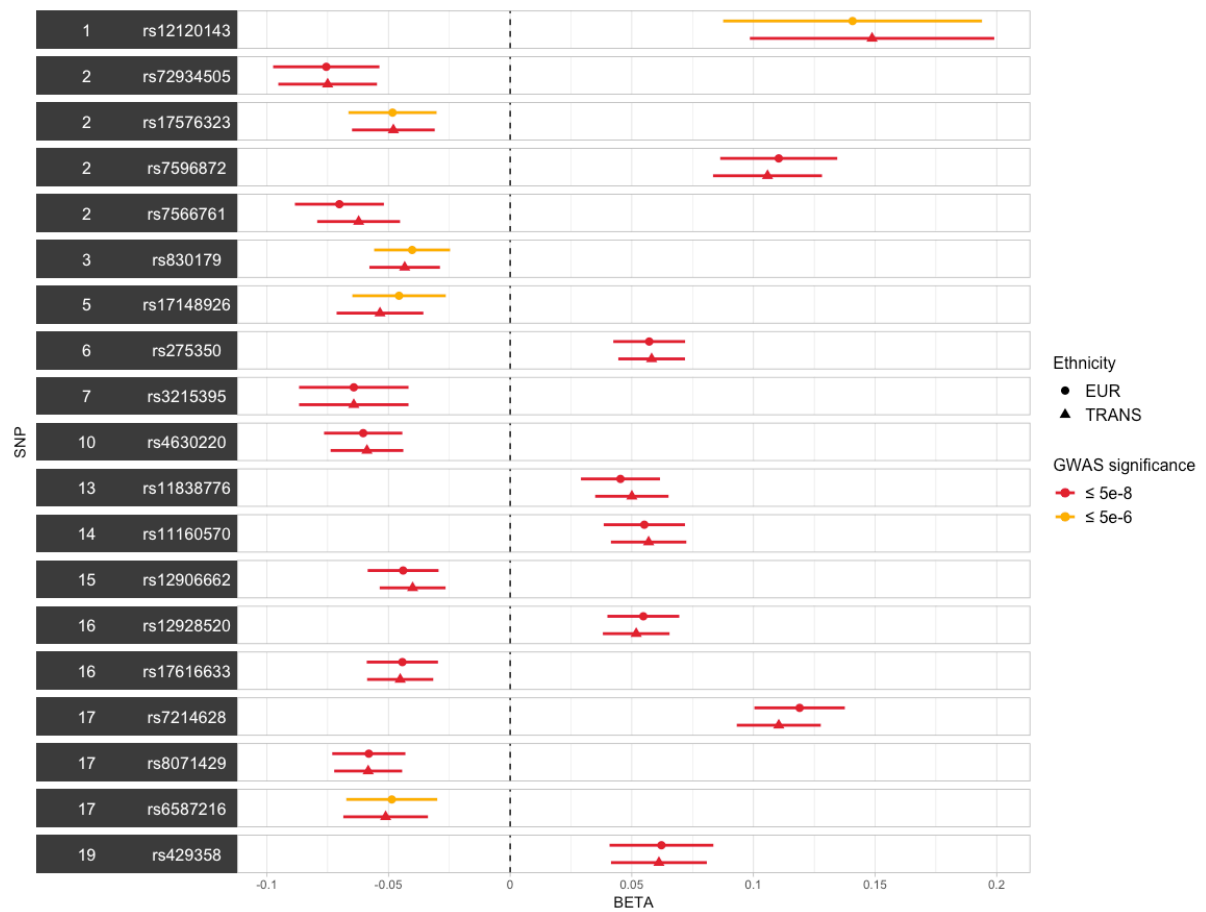

Supplementary Figure 3. Comparison between European and trans-ethnic results for WMH reported top SNPs. Beta coefficients were estimated from meta-analysis Z-scores and sample sizes, and allele frequencies in UK Biobank. Error bars, mean  $\pm$  1.96 s.e..





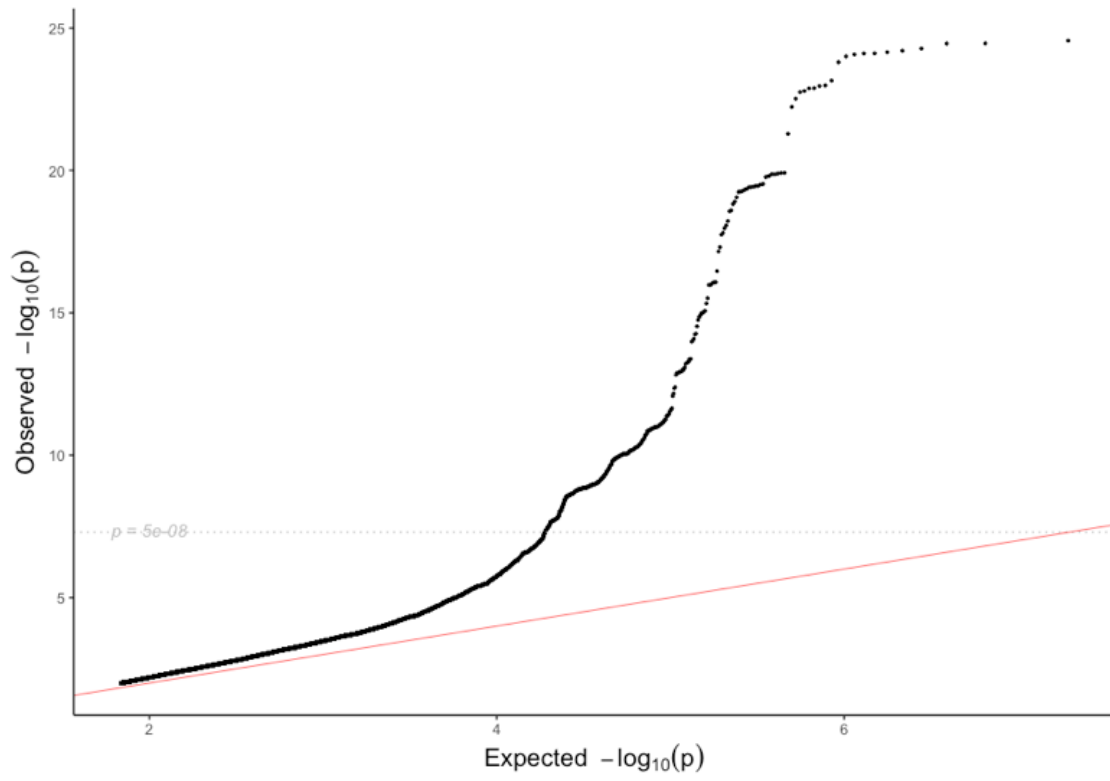

Supplementary Figure 5. QQ plot for FA GWAS in UK Biobank.

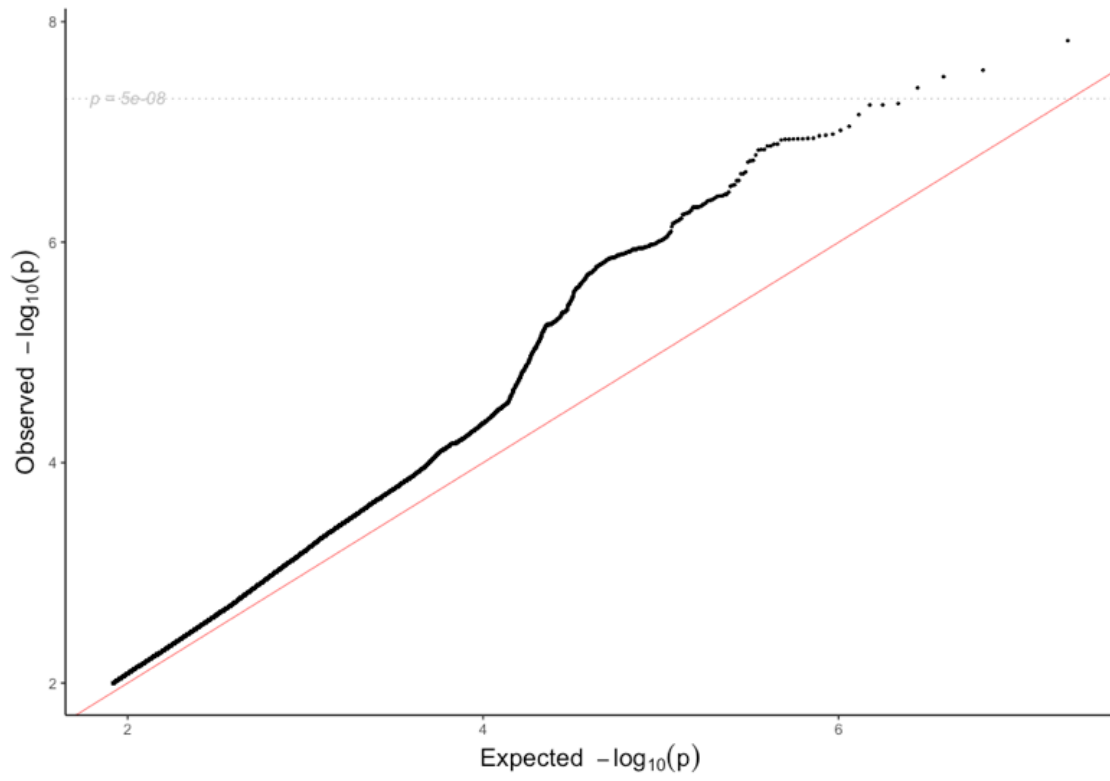

Supplementary Figure 6. QQ plot for MD GWAS in UK Biobank.

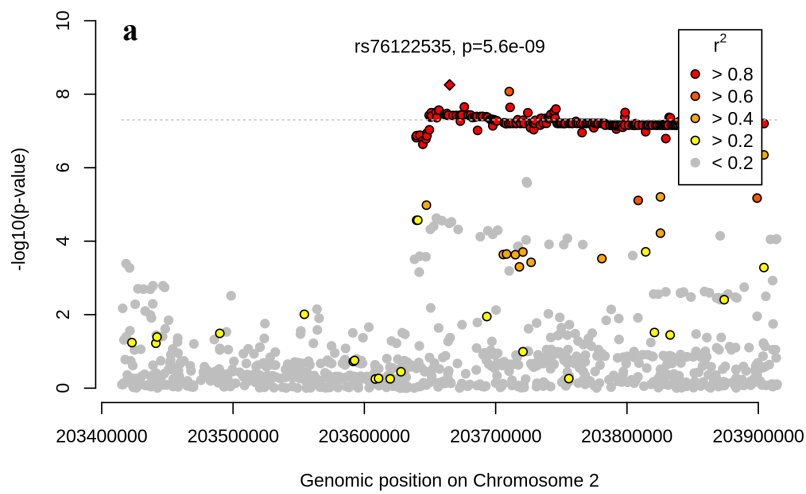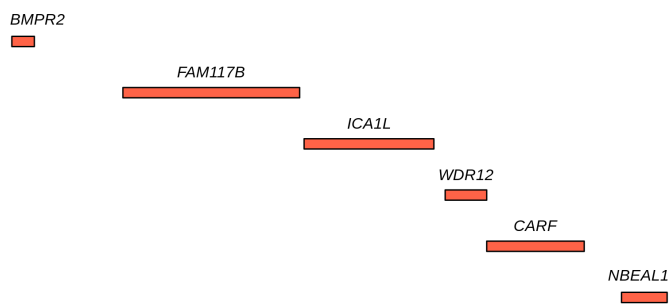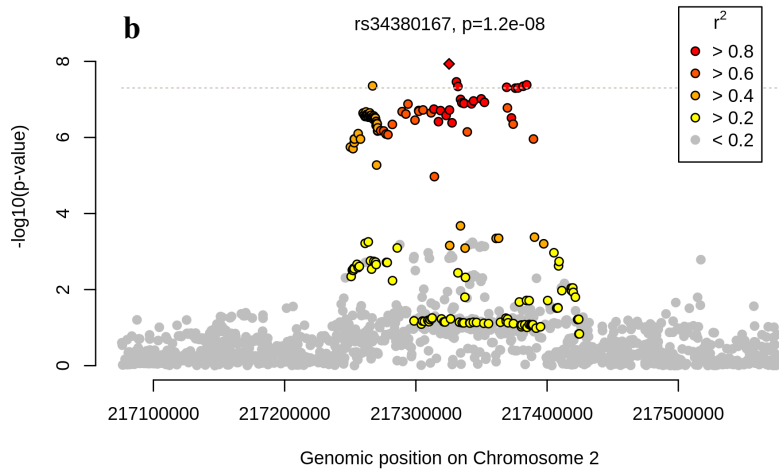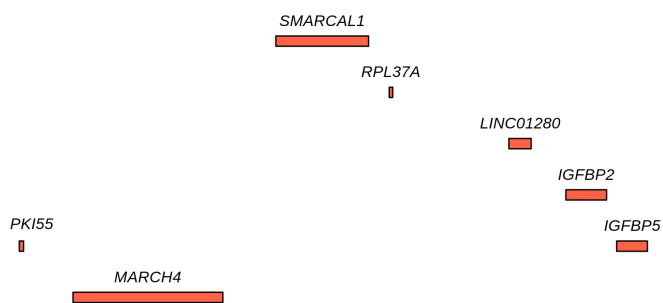

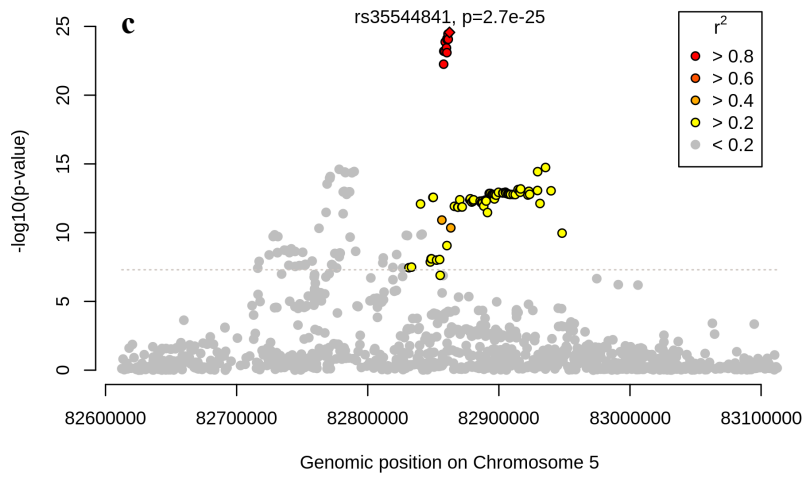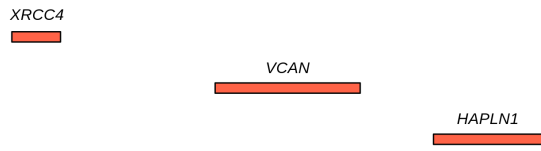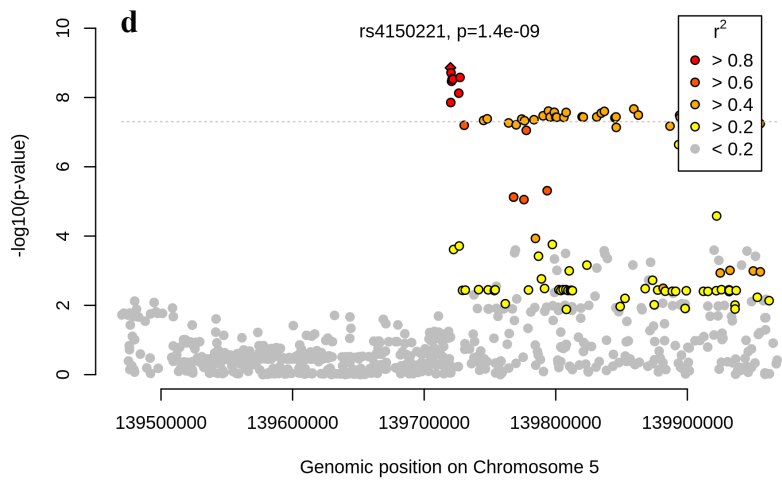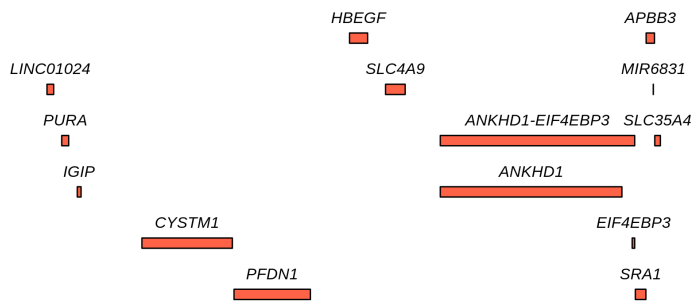

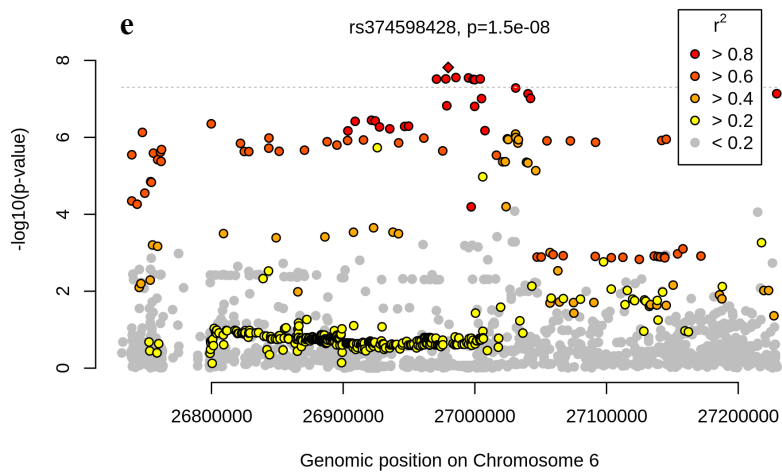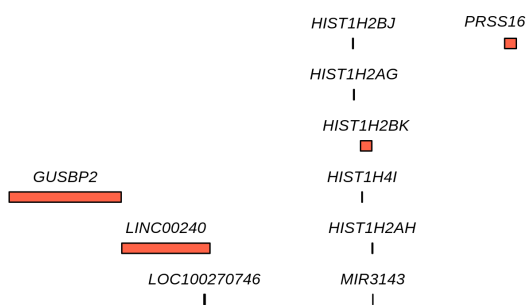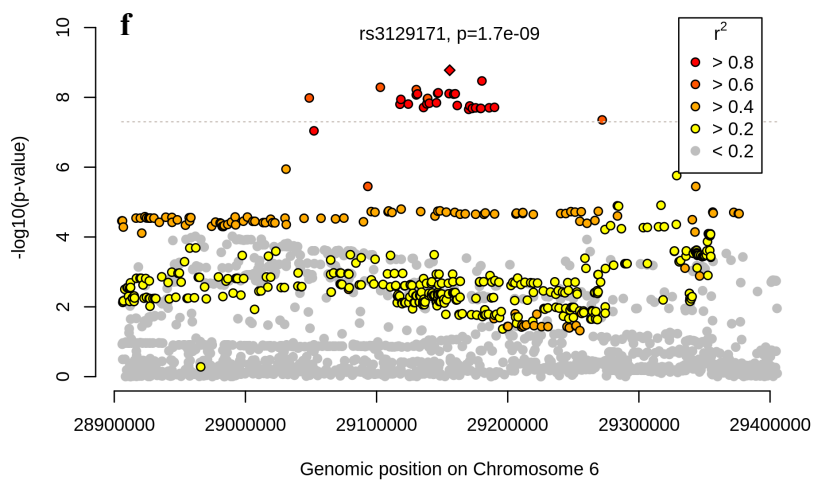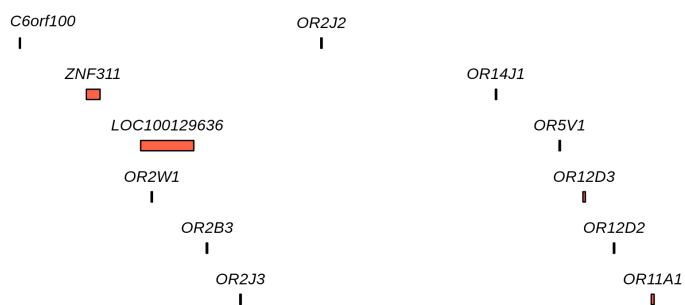

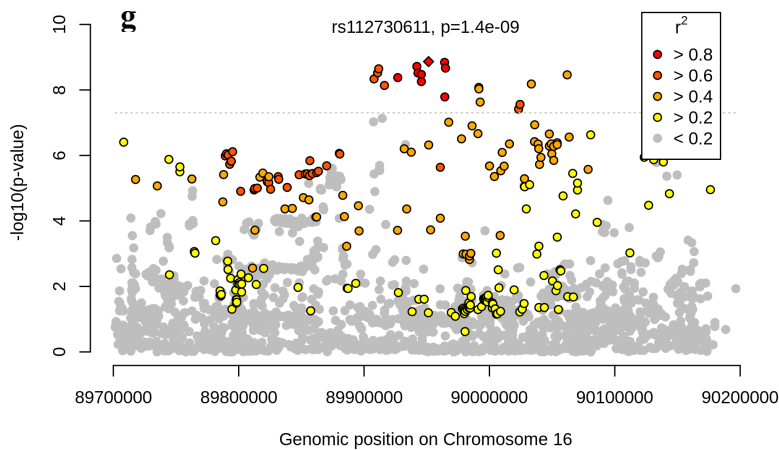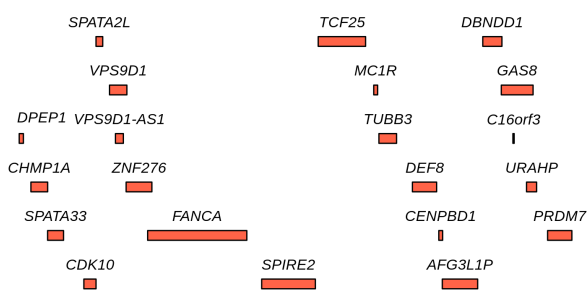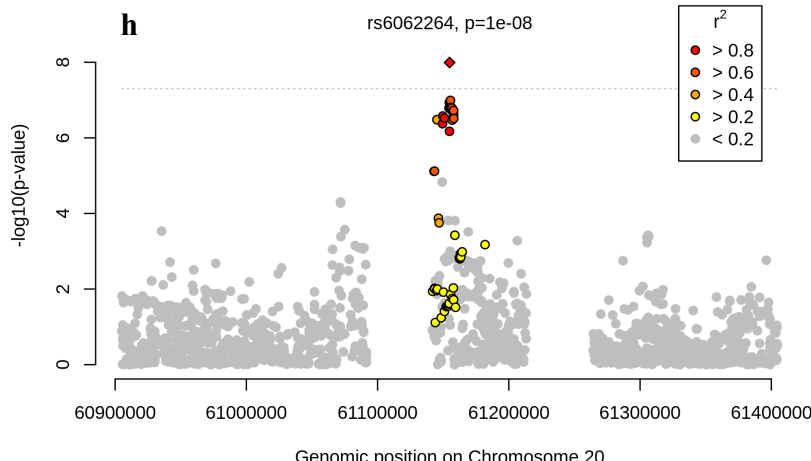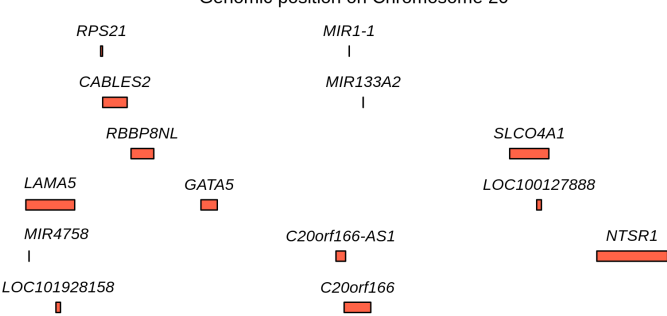

Supplementary Figure 7. Regional plots of FA significant association results. The different panels correspond to the following top SNPs: **a.** rs76122535, **b.** rs34380167, **c.** rs35544841, **d.** rs4150221, **e.** rs374598428, **f.** rs3129171, **g.** rs112730611 and **h.** rs6062264.

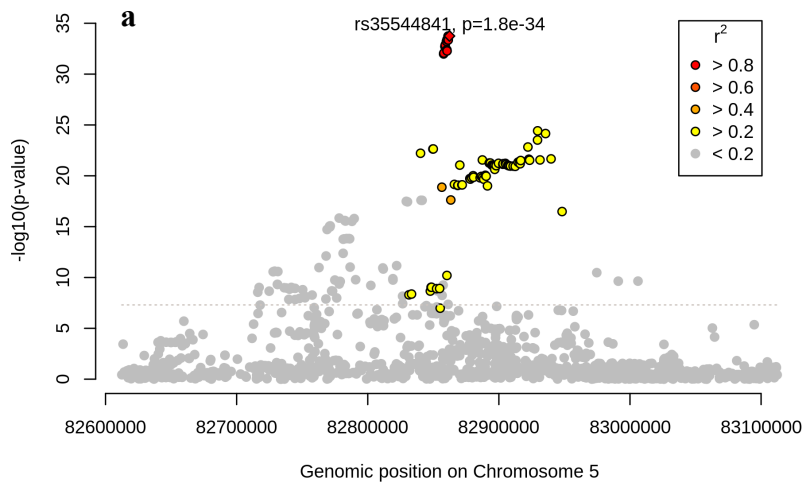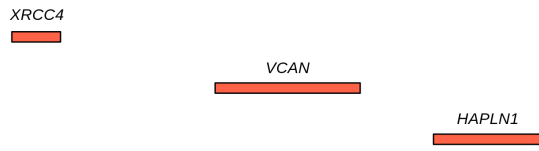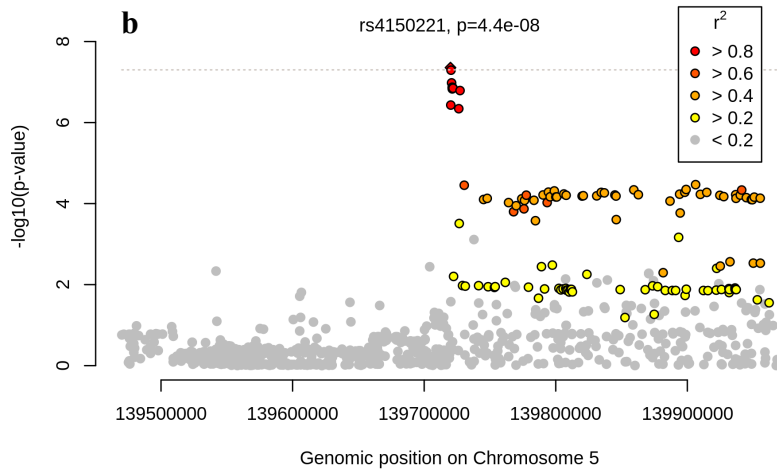



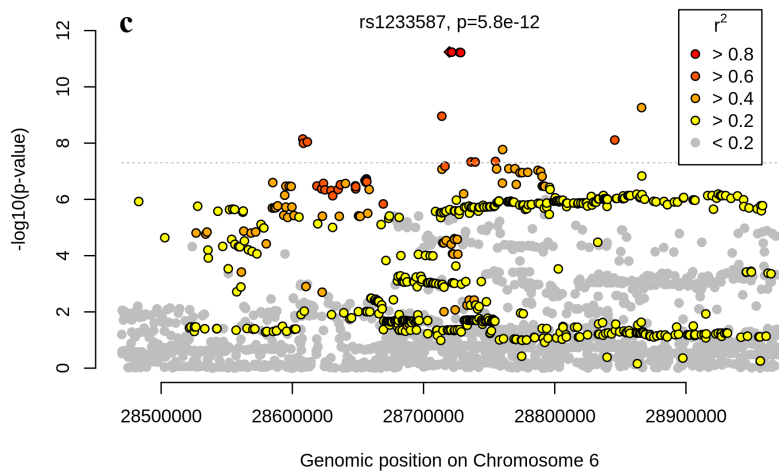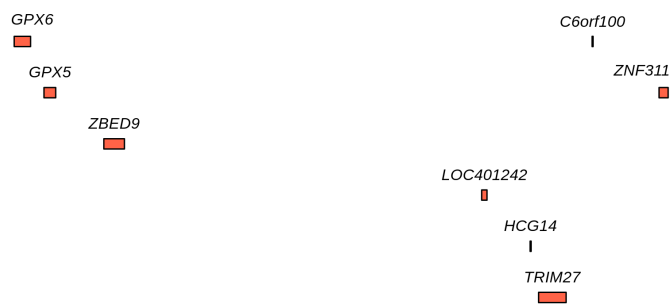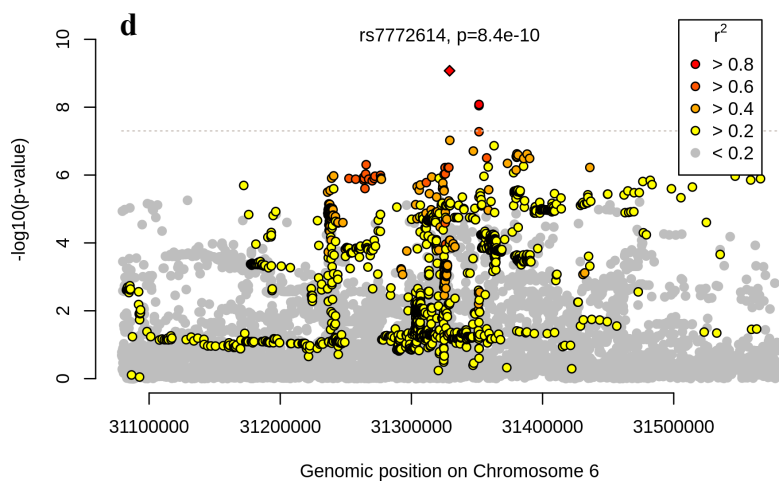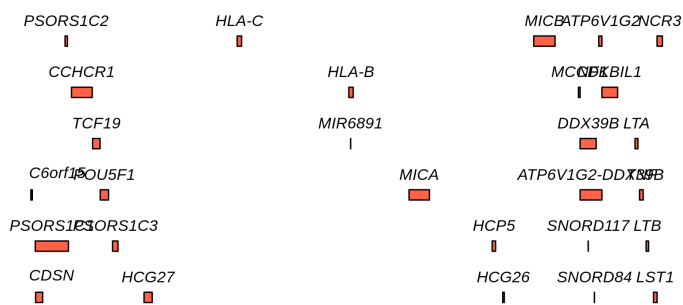

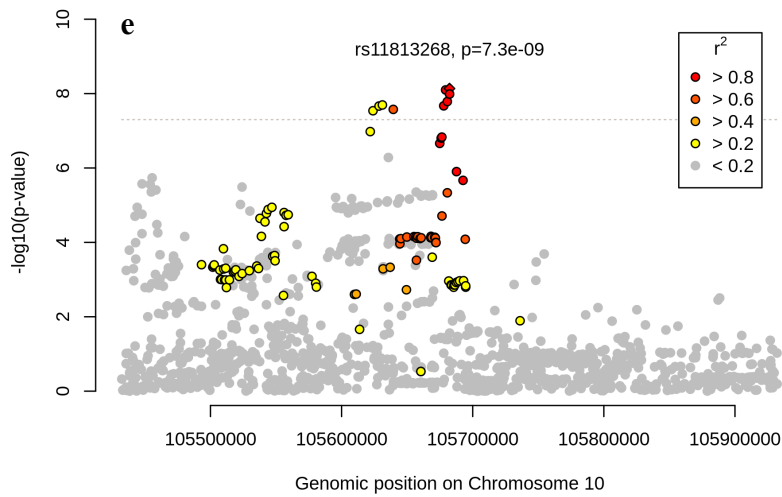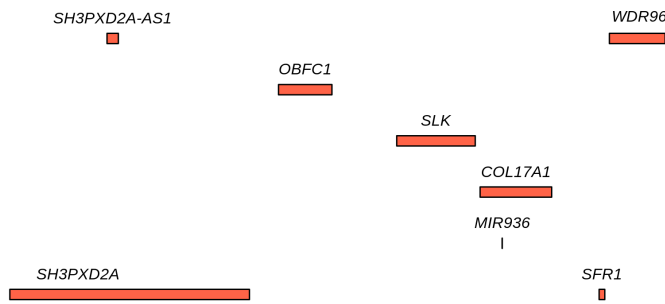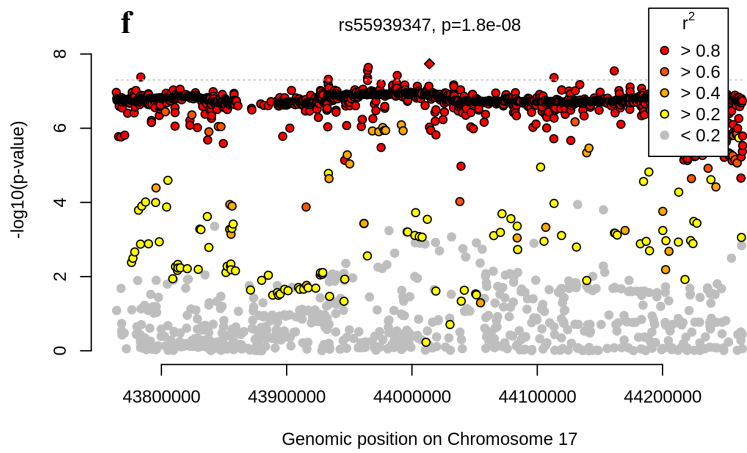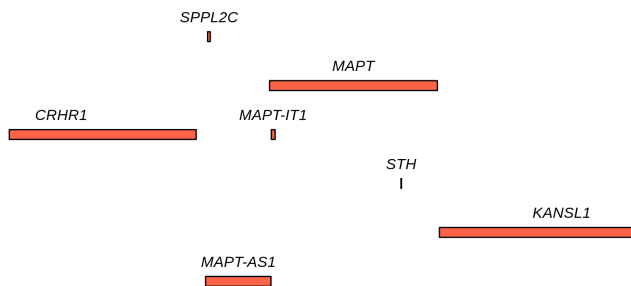

Supplementary Figure 8. Regional plots of MD significant association results. The different panels correspond to the following top SNPs: **a.** rs35544841, **b.** rs4150221, **c.** rs1233587, **d.** rs7772614, **e.** rs11813268 and **f.** rs55939347.

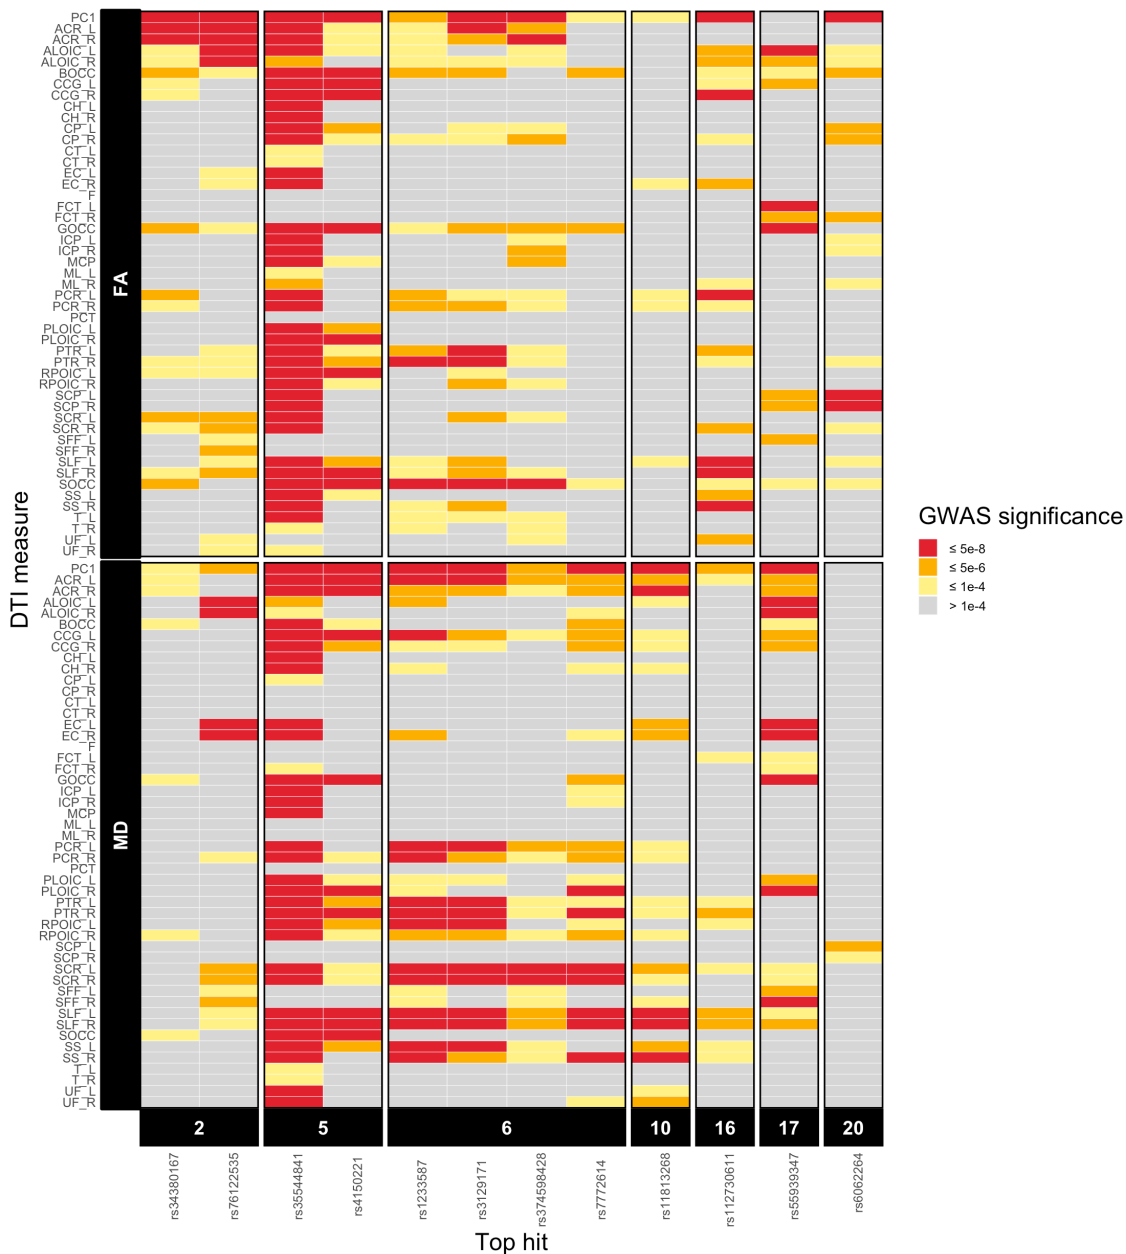

Supplementary Figure 9. Association results in the different brain regions.

Abbreviations: PC1: first principal component, as the global measure of white matter DTI signal; L: left; R: right; ACR: anterior corona radiata; ALOIC: anterior limb of internal capsule; BOCC: body of corpus callosum; CCG: cingulum cingulate gyrus; CH: cingulum hippocampus; CP: cerebral peduncle; CT: corticospinal tract; EC: external capsule; F: fornix; FCT: fornix cres/stria terminalis; GOCC: genu of corpus callosum; ICP: inferior cerebellar peduncle; MCP: middle cerebellar peduncle; ML: medial lemniscus; PCR posterior corona radiata; PCT: pontine crossing tract; PLOIC: posterior limb of internal capsule; PTR: posterior thalamic radiation; RPOIC: retrolenticular part of internal capsule; SCP: superior cerebellar peduncle; SCR: superior corona radiata; SFF: superior fronto-occipital fasciculus; SLF: superior longitudinal fasciculus; SOCC: splenium of corpus callosum; SS sagittal stratum; T: tapetum; UF: uncinat fasciculus

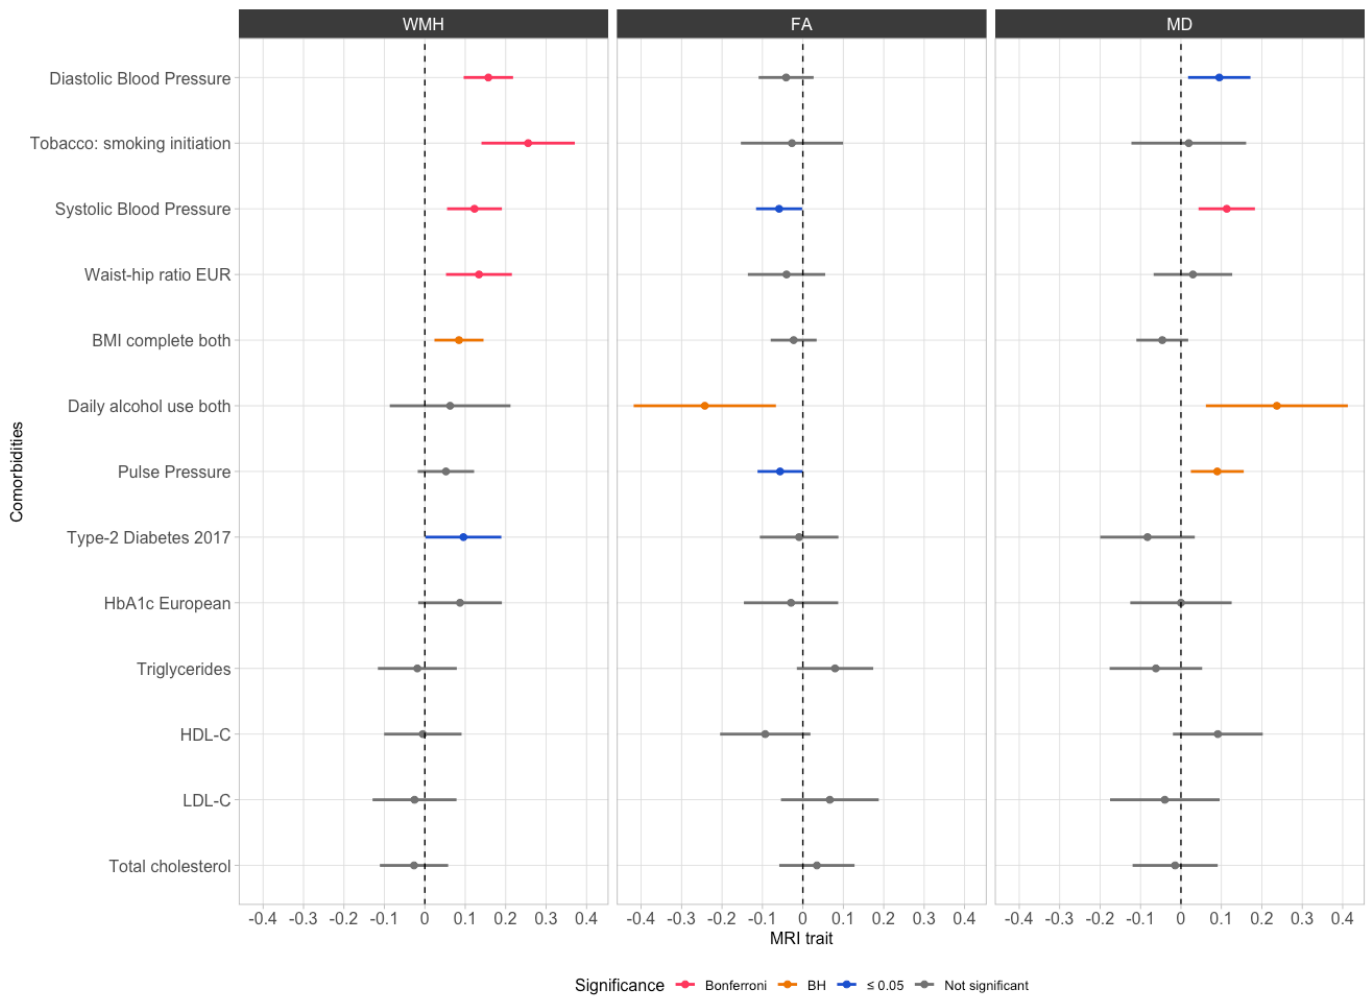

Supplementary Figure 10. Genetic correlation results with CSVD comorbidities. Bonferroni and Benjamini and Hochberg multiple testing corrections were applied considering only p-values for genetic correlation with these cardiovascular risk factors. Error bars, mean  $\pm$  1.96 S.E..

### Tissue enrichment in WMH

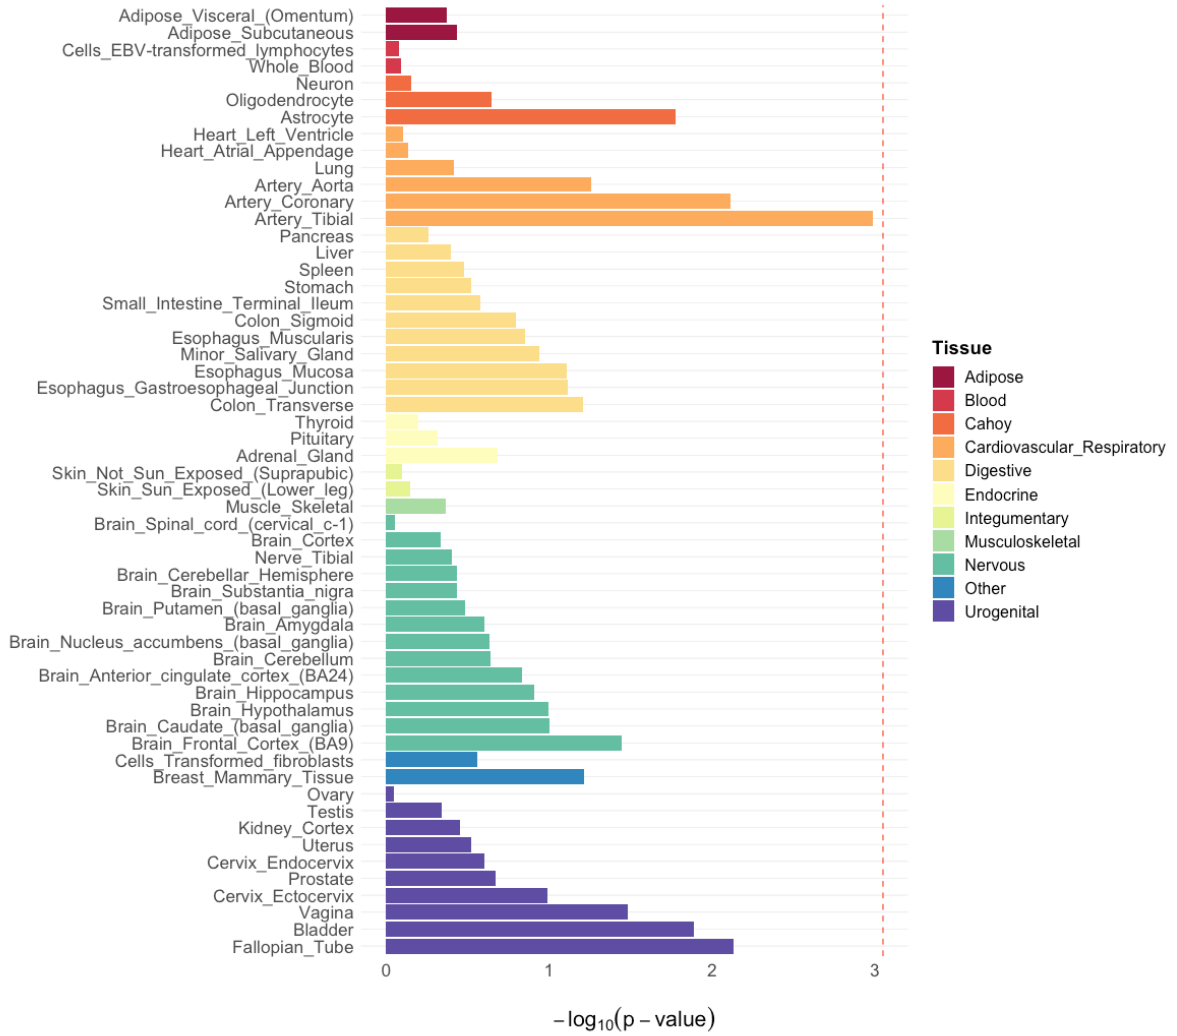

Supplementary Figure 11. Tissue enrichment in WMH GWAS meta-analysis summary statistics.

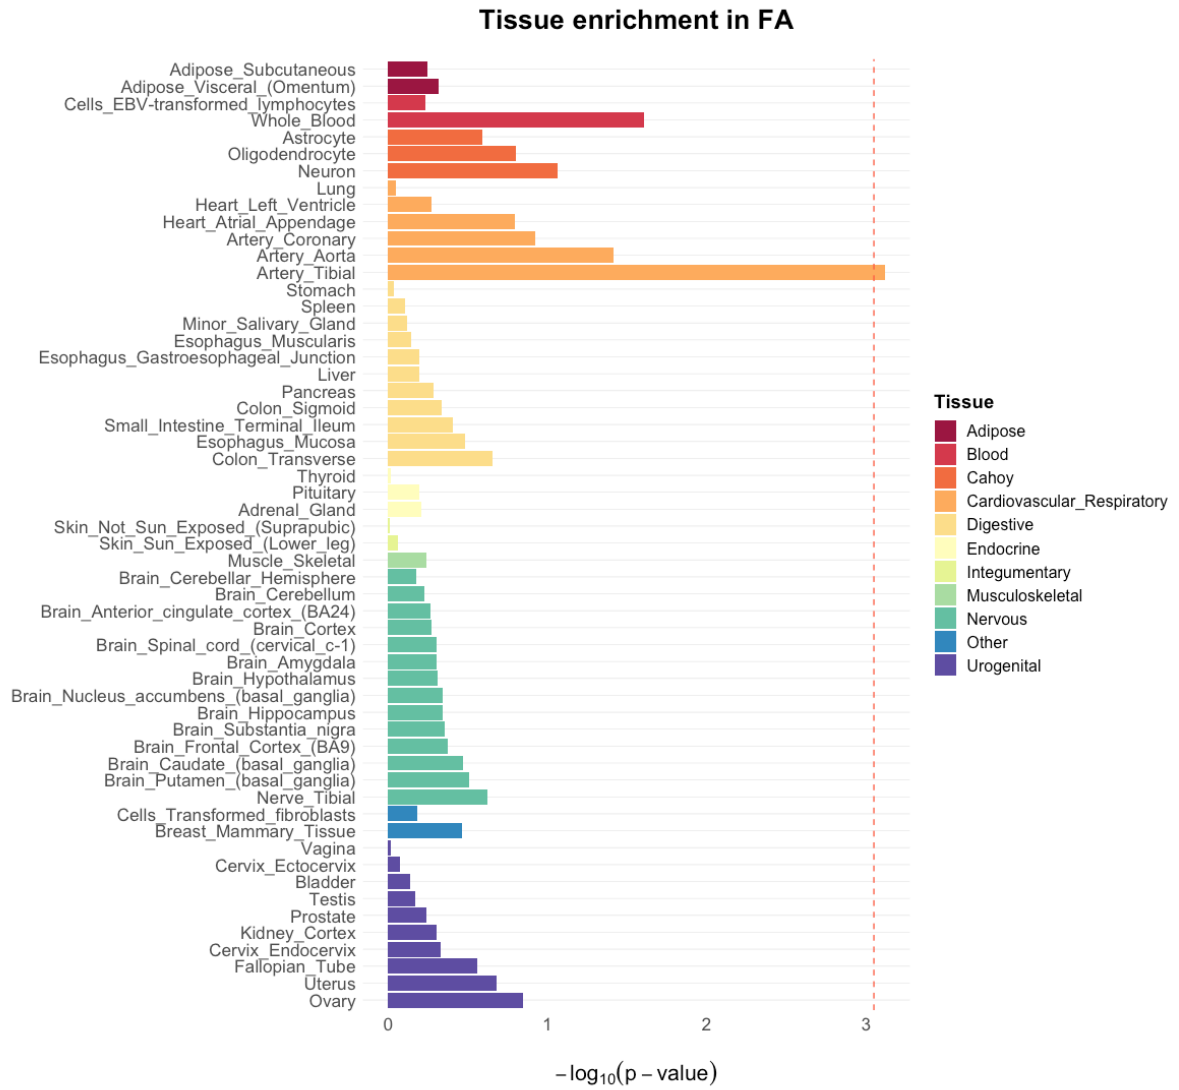

Supplementary Figure 12. Tissue enrichment in FA GWAS summary statistics.

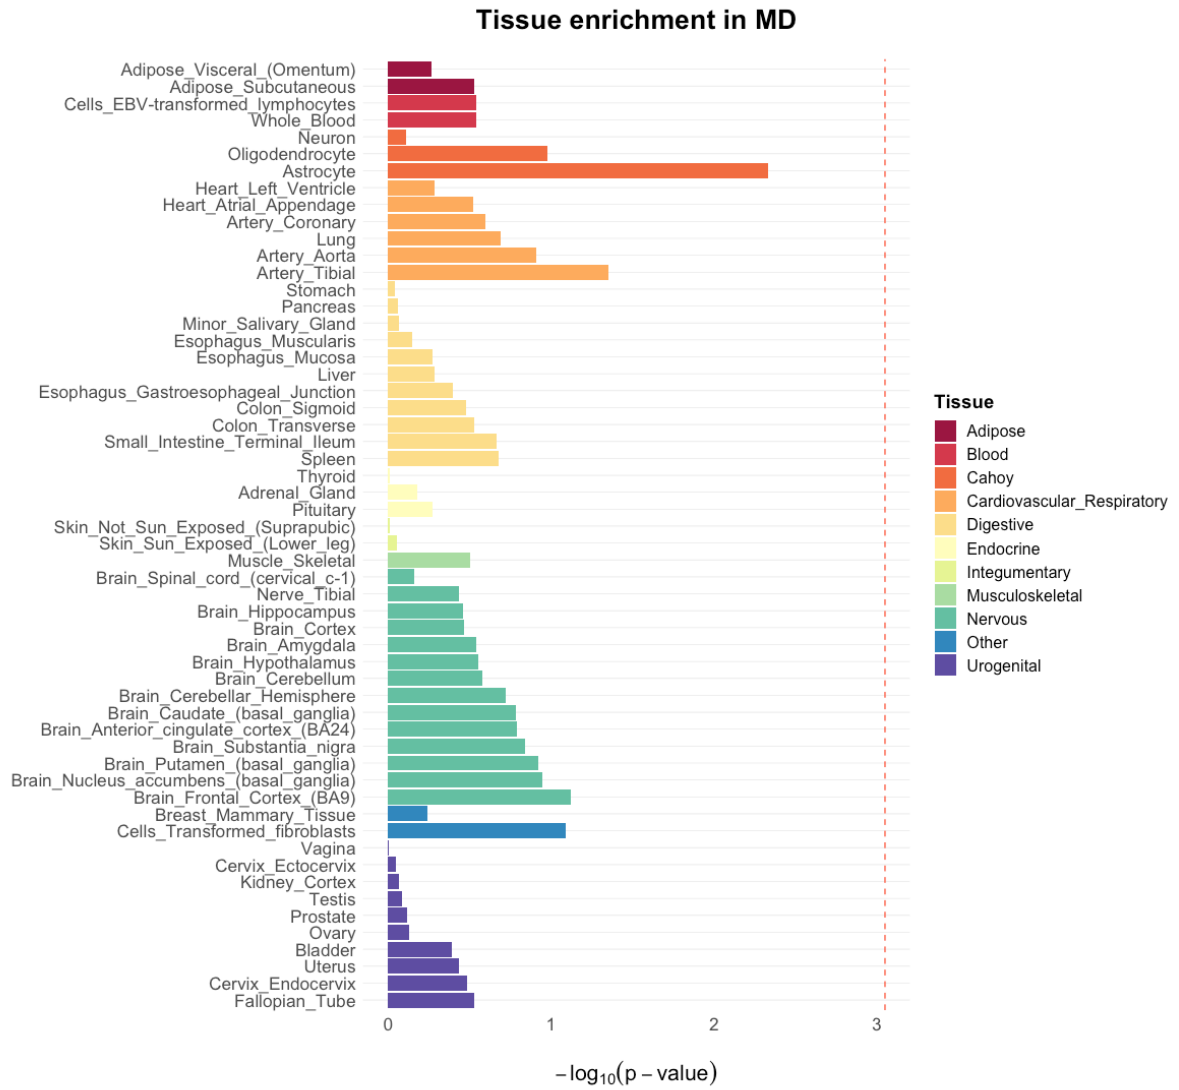

Supplementary Figure 13. Tissue enrichment in MD GWAS summary statistics.



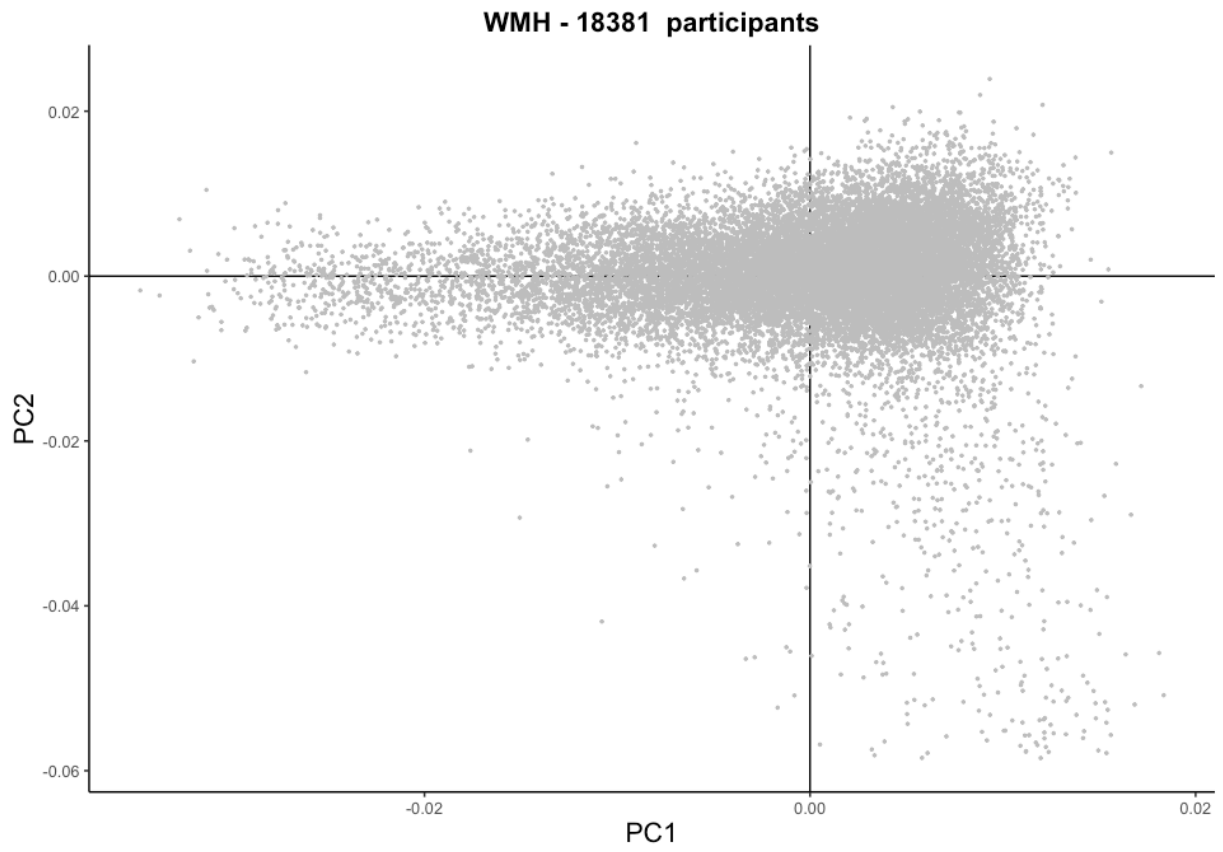

Supplementary Figure 14. Graph of individuals for PCA on WMH dataset.

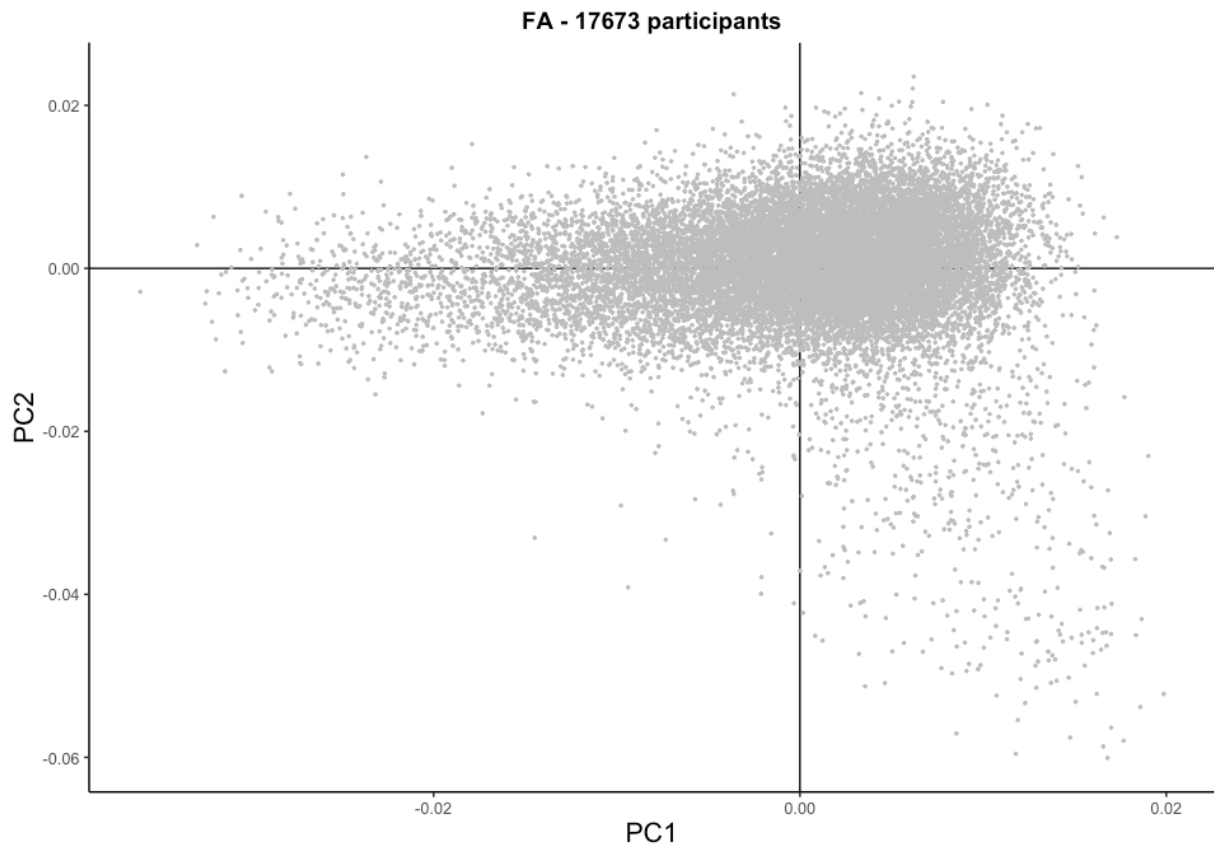

Supplementary Figure 15. Graph of individuals for PCA on FA dataset.

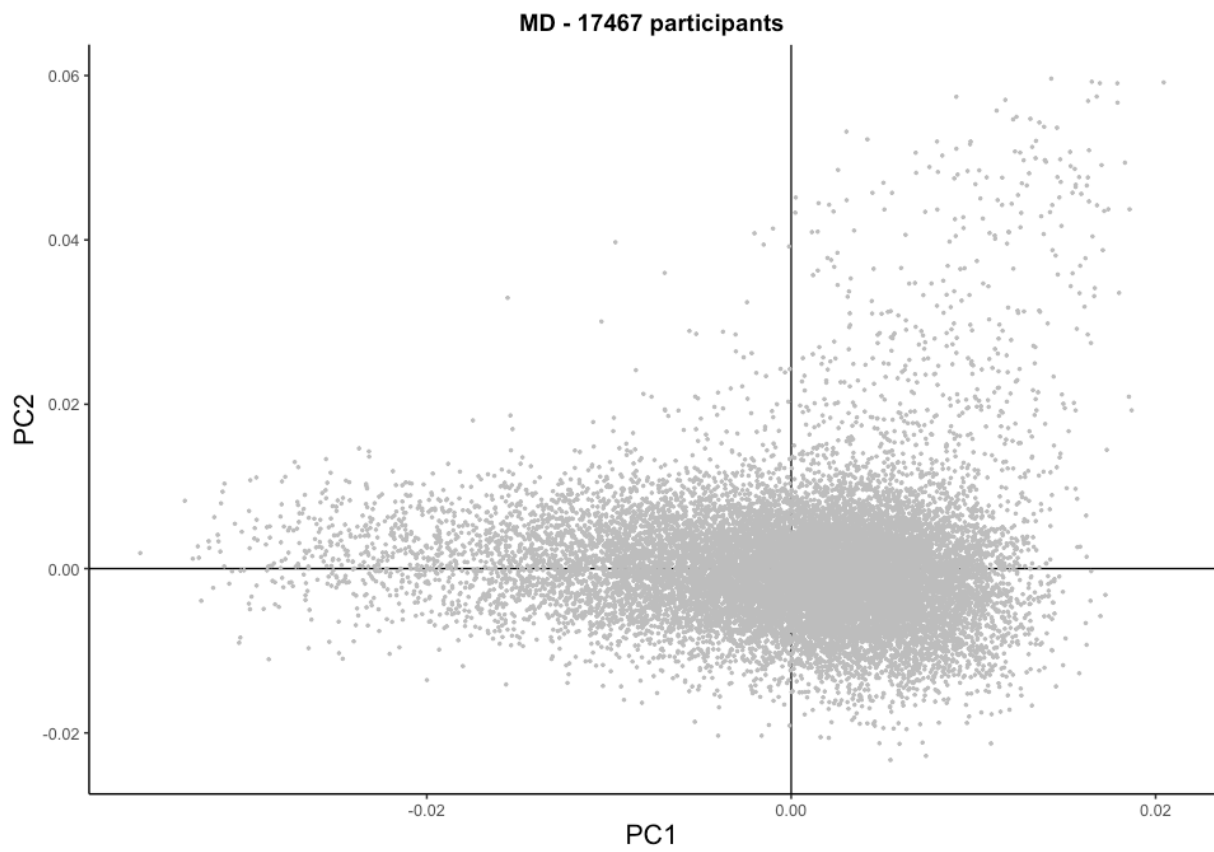

Supplementary Figure 16. Graph of individuals for PCA on MD dataset.

Supplementary Table 1. PCA eigenvalues and explained percentages of variance for FA and MD measure derivation

| <b>PC</b> | <b>Eigen value</b> | <b>Percentage of variance</b> | <b>Cumulative percentage of variance</b> | <b>Eigen value</b> | <b>Percentage of variance</b> | <b>Cumulative percentage of variance</b> |
|-----------|--------------------|-------------------------------|------------------------------------------|--------------------|-------------------------------|------------------------------------------|
| 1         | 18.17              | 37.86                         | 37.86                                    | 19.57              | 40.76                         | 40.76                                    |
| 2         | 3.7                | 7.71                          | 45.58                                    | 4.86               | 10.13                         | 50.9                                     |
| 3         | 2.62               | 5.46                          | 51.04                                    | 3.58               | 7.47                          | 58.36                                    |
| 4         | 1.86               | 3.87                          | 54.91                                    | 2.4                | 5.01                          | 63.37                                    |
| 5         | 1.72               | 3.59                          | 58.5                                     | 2.13               | 4.43                          | 67.8                                     |

Supplementary Table 2. GO enrichment analysis.

| TRAIT | SET        | NGENES | BETA  | BETA_STD | SE     | P        | Name                                                                             | Category           | pBH      |
|-------|------------|--------|-------|----------|--------|----------|----------------------------------------------------------------------------------|--------------------|----------|
| WMH   | GO:0098910 | 3      | 2.31  | 0.0294   | 0.553  | 1.51E-05 | regulation of atrial cardiac muscle cell action potential                        | biological process | 0.04085  |
| WMH   | GO:0048050 | 3      | 2.39  | 0.0305   | 0.584  | 2.08E-05 | post-embryonic eye morphogenesis                                                 | biological process | 0.04085  |
| WMH   | GO:0005925 | 397    | 0.181 | 0.0263   | 0.0416 | 6.47E-06 | focal adhesion                                                                   | cell component     | 0.031746 |
| WMH   | GO:0031752 | 3      | 1.87  | 0.0239   | 0.405  | 1.95E-06 | D5 dopamine receptor binding                                                     | molecular function | 0.019137 |
| WMH   | GO:0016176 | 7      | 1.17  | 0.0228   | 0.285  | 2.05E-05 | superoxide-generating NADPH oxidase activator activity                           | molecular function | 0.04085  |
| WMH   | GO:0004713 | 81     | 0.363 | 0.024    | 0.0903 | 3.01E-05 | protein tyrosine kinase activity                                                 | molecular function | 0.049283 |
| MD    | GO:0098912 | 3      | 2.67  | 0.034    | 0.564  | 1.09E-06 | membrane depolarization during atrial cardiac muscle cell action potential       | biological process | 0.003555 |
| MD    | GO:0086045 | 5      | 1.71  | 0.0281   | 0.415  | 1.99E-05 | membrane depolarization during AV node cell action potential                     | biological process | 0.048783 |
| MD    | GO:0086056 | 3      | 2.68  | 0.0341   | 0.543  | 4.09E-07 | voltage-gated calcium channel activity involved in AV node cell action potential | molecular function | 0.003555 |
| MD    | GO:0005540 | 24     | 0.77  | 0.0278   | 0.162  | 1.01E-06 | hyaluronic acid binding                                                          | molecular function | 0.003555 |

TRAIT: imaging trait; SET: gene set as the GO term ID; NGENES: the number of genes in the data that are in the set; BETA: the regression coefficient of the variable; BETA\_STD: the semi-standardized regression coefficient; SE: the standard error of the regression coefficient; P: p-value for gene-set enrichment; Name: the GO term name; Category: the GO category; pBH: p-value after Benjamini-Hochberg FDR multiple testing correction.

Supplementary Table 3. Contribution of cardiovascular risk factors to WMH measure in UK Biobank population.

| <b>Risk factors</b>                                 | <b>Field derivation</b>                                   | <b>Sample size</b> | <b>Adjusted R2</b> | <b>P-value</b>         |
|-----------------------------------------------------|-----------------------------------------------------------|--------------------|--------------------|------------------------|
| Average systolic blood pressure, automated reading  | mean(f4080_2_0,f4080_2_1)                                 | 15444              | 0.0108             | 1.34×10 <sup>-38</sup> |
| Average diastolic blood pressure, automated reading | mean(f4079_2_0,f4079_2_1)                                 | 15444              | 0.0096             | 2.49×10 <sup>-34</sup> |
| Waist/hip ratio                                     | f48_2_0/f49_2_0                                           | 17979              | 0.0067             | 2.34×10 <sup>-28</sup> |
| Average weekly alcohol intake                       | f1588_2_0 + f1578_2_0 + f1608_2_0 + f5364_2_0 + f1598_2_0 | 13226              | 0.0058             | 1.15×10 <sup>-18</sup> |
| Body mass index                                     | f21001_2_0                                                | 17926              | 0.0047             | 1.93×10 <sup>-20</sup> |
| Diabetes diagnosed by doctor                        | f2443_2_0                                                 | 18225              | 0.0039             | 2.48×10 <sup>-17</sup> |
| Ever smoked                                         | f20160_2_0                                                | 18197              | 0.0013             | 8.33×10 <sup>-07</sup> |

Supplementary Table 4. Mouse brain cell-type enrichment analysis.

| GENE_SET_DEF | SET     | NGENES | BETA     | BETA_STD | SE     | P        |
|--------------|---------|--------|----------|----------|--------|----------|
| TOP100       | aaSMC   | 91     | 0.136    | 0.00953  | 0.0852 | 0.054989 |
| TOP100       | AC      | 84     | -0.0768  | -0.00517 | 0.0897 | 0.80392  |
| TOP100       | aEC     | 115    | 0.0169   | 0.00133  | 0.0808 | 0.41737  |
| TOP100       | aSMC    | 95     | 0.15     | 0.0108   | 0.088  | 0.04386  |
| TOP100       | capilEC | 102    | -0.0576  | -0.00427 | 0.0784 | 0.76877  |
| TOP100       | EC1     | 109    | 0.0904   | 0.00693  | 0.0827 | 0.13715  |
| TOP100       | EC2     | 110    | -0.12    | -0.00922 | 0.0793 | 0.93471  |
| TOP100       | EC3     | 95     | 0.0404   | 0.00289  | 0.0836 | 0.3142   |
| TOP100       | FB1     | 113    | -0.16    | -0.0125  | 0.0832 | 0.97263  |
| TOP100       | FB2     | 106    | 0.109    | 0.00825  | 0.0869 | 0.10442  |
| TOP100       | MG      | 117    | -0.0472  | -0.00374 | 0.0786 | 0.7258   |
| TOP100       | OL      | 97     | 0.0376   | 0.00272  | 0.0816 | 0.32244  |
| TOP100       | PC      | 102    | -0.0551  | -0.00408 | 0.08   | 0.75441  |
| TOP100       | vEC     | 89     | 0.0563   | 0.0039   | 0.0823 | 0.24676  |
| TOP100       | vSMC    | 89     | -0.125   | -0.00866 | 0.0896 | 0.91862  |
| TOP500       | aaSMC   | 535    | 0.0319   | 0.00535  | 0.037  | 0.19425  |
| TOP500       | AC      | 460    | 0.0322   | 0.00503  | 0.0396 | 0.20749  |
| TOP500       | aEC     | 545    | 0.0299   | 0.00506  | 0.0357 | 0.20154  |
| TOP500       | aSMC    | 528    | 0.0519   | 0.00864  | 0.0377 | 0.08441  |
| TOP500       | capilEC | 519    | 0.0564   | 0.00931  | 0.0363 | 0.060042 |
| TOP500       | EC1     | 515    | 0.026    | 0.00427  | 0.0368 | 0.23995  |
| TOP500       | EC2     | 541    | -0.0915  | -0.0154  | 0.0355 | 0.99502  |
| TOP500       | EC3     | 526    | 0.0244   | 0.00406  | 0.0365 | 0.25171  |
| TOP500       | FB1     | 485    | -0.00884 | -0.00141 | 0.038  | 0.59196  |
| TOP500       | FB2     | 500    | 0.0759   | 0.0123   | 0.0391 | 0.026026 |
| TOP500       | MG      | 544    | -0.0273  | -0.00462 | 0.0365 | 0.77292  |
| TOP500       | OL      | 480    | 0.0522   | 0.0083   | 0.0378 | 0.083886 |
| TOP500       | PC      | 494    | 0.0124   | 0.002    | 0.0381 | 0.37261  |
| TOP500       | vEC     | 507    | 0.0129   | 0.00211  | 0.0368 | 0.36306  |
| TOP500       | vSMC    | 500    | 0.033    | 0.00535  | 0.0383 | 0.19469  |

Abbreviations: SMC: smooth muscle cell; EC: endothelial cell; PC: pericytes; vSMC: venous SMC; aaSMC: arteriolar SMC; aSMC: arterial SMC; MG: microglia; FB1: fibroblast-like type I; FB2: fibroblast-like type II; OL: oligodendrocytes; EC1: EC type 1; EC2: EC type 2; EC3: EC type 3; vEC: venous EC; capilEC: capillary EC; aEC: arterial EC; AC: astrocyte; GENE\_SET\_DEF: gene-set definition, i.e. top 100 or top 500 differentially expressed genes between the cell type vs other cell types; SET: cell-type gene set; NGENES: the number of genes in the data that are in the set; BETA: the regression coefficient of the variable; BETA\_STD: the semi-standardized regression coefficient; SE: the standard error of the regression coefficient; P: p-value for gene-set enrichment

Supplementary Table 5. Removed field codes description.

|                           | <b>Non-cancer illness code, self-reported<br/>(20002)</b> | <b>ICD9<br/>(41203, 41205)</b> | <b>ICD10<br/>(41202, 41204)</b> |
|---------------------------|-----------------------------------------------------------|--------------------------------|---------------------------------|
| <b>Stroke</b>             | 1081, 1086, 1491, 1583                                    | 430, 431, 434,<br>436          | I60, I61, I63, I64              |
| <b>Multiple sclerosis</b> | 1261                                                      | 340                            | G35                             |
| <b>Parkinson</b>          | 1262                                                      | 332                            | G20                             |
| <b>Dementia</b>           | 1263                                                      | 290                            | F00-F03                         |
| <b>Neurodegenerative</b>  | 1397                                                      | 341                            | G30-G32, G36,<br>G37            |



Supplementary Table 6. Sample quality control description.

|                                                | <b>WMH</b> | <b>FA</b> | <b>MD</b> |
|------------------------------------------------|------------|-----------|-----------|
| <b>Individuals with phenotype data</b>         | 20,200     | 19,395    | 19,395    |
| <b>With a disease code</b>                     | -409       | -398      | -398      |
| <b>Remaining</b>                               | 19,791     | 18,997    | 18,997    |
| <b>Outliers</b>                                | 0          | -71       | -282      |
| <b>Remaining</b>                               | 19,791     | 18,926    | 18,715    |
| <b>No QC information</b>                       | -508       | -471      | -260      |
| <b>Remaining</b>                               | 19,283     | 18,455    | 18,455    |
| <b>(1) Kinship <math>\geq 0.0884</math></b>    | -156       | -145      | -144      |
| <b>(2) Gender mismatch</b>                     | -15        | -14       | -13       |
| <b>(3) Outliers (het. missing.)</b>            | -37        | -36       | -36       |
| <b>(3) Missing rate <math>&gt; 0.05</math></b> | -14        | -14       | -14       |
| <b>(4) No European ancestry</b>                | -481       | -455      | -449      |
| <b>Intersect from (1) to (4)</b>               | -688       | -649      | -641      |
| <b>Remaining</b>                               | 18,595     | 17,806    | 17,605    |
| <b>Outliers with smartpca</b>                  | -213       | -143      | -138      |
| <b>Individuals for GWAS analysis</b>           | 18,381     | 17,663    | 17,467    |

Supplementary Table 7. UK Biobank field codes to derive covariates.

| <b>Covariate</b>      | <b>Field code</b>                       | <b>Description</b>                                            |
|-----------------------|-----------------------------------------|---------------------------------------------------------------|
| <b>Sex</b>            | 31                                      | Sex                                                           |
| <b>Age at MRI</b>     | 34                                      | Year of birth                                                 |
|                       | 52                                      | Month of birth                                                |
|                       | 53                                      | Date of attending assessment centre                           |
| <b>UKB centre</b>     | 54                                      | UK Biobank assessment centre                                  |
| <b>Genotype Batch</b> | Note: From sample QC file               |                                                               |
| <b>Mean rfMRI</b>     | 25741                                   | Mean rfMRI head motion, averaged across space and time points |
| <b>Mean tfMRI</b>     | 25742                                   | Mean tfMRI head motion, averaged across space and time points |
| <b>PC1 – PC10</b>     | Note: Derived from PCA on genotype data |                                                               |

Supplementary Table 8. Covariate description.

| Covariate      |                          | WMH               | FA                | MD                |
|----------------|--------------------------|-------------------|-------------------|-------------------|
|                |                          | N = 18,381        | N = 17,673        | N = 17,467        |
| Sex            | Female                   | 9,688<br>(52.7%)  | 9,362<br>(53.0%)  | 9,278<br>(53.1%)  |
|                | Male                     | 8,693<br>(47.3%)  | 8,311<br>(47.0%)  | 8,189<br>(46.9%)  |
| Age at MRI     | Mean (Sd)                | 63.3 (7.4)        | 63.2 (7.4)        | 63.1 (7.4)        |
| UKB centre     | Cheadle                  | 15,431<br>(84.0%) | 14,802<br>(83.8%) | 14,622<br>(83.7%) |
|                | Newcastle                | 2,950<br>(16.0%)  | 2,871<br>(16.2%)  | 2,845<br>(16.3%)  |
| Genotype Batch | UKBB                     | 16,582<br>(90.2%) | 15,943<br>(90.2%) | 15,759<br>(90.2%) |
|                | UKBL                     | 1,799<br>(9.8%)   | 1,730<br>(9.8%)   | 1,708<br>(9.8%)   |
| Mean rfMRI     | Number of missing values | 799               | 58                | 57                |
| Mean tfMRI     | Number of missing values | 1847              | 1109              | 1095              |
| PC1-PC10       |                          |                   |                   |                   |

Supplementary Table 9. Description of covariates in relation to WMH, FA and MD phenotypes

| Covariate      |           |           | WMH         | FA           | MD           |
|----------------|-----------|-----------|-------------|--------------|--------------|
|                |           |           | N = 18,381  | N = 17,673   | N = 17,467   |
| Sex            | Female    | Mean (Sd) | 7.80 (1.15) | -0.14 (4.2)  | -0.38 (4.33) |
|                | Male      | Mean (Sd) | 8.13 (1.18) | 0.16 (4.33)  | 0.43 (4.48)  |
| Age at MRI     | r2        |           | 0.6         | -0.35        | 0.4          |
| UKB centre     | Cheadle   | Mean (Sd) | 7.91 (1.18) | 0.09 (4.24)  | 0.19 (4.39)  |
|                | Newcastle | Mean (Sd) | 8.21 (1.12) | -0.47 (4.35) | -0.96 (4.45) |
| Genotype Batch | UKBB      | Mean (Sd) | 7.95 (1.18) | 0.01 (4.26)  | -0.01 (4.42) |
|                | UKBL      | Mean (Sd) | 7.98 (1.20) | -0.11 (4.30) | 0.06 (4.50)  |
| Mean rfMRI     | r2        |           | 0.23        | -0.15        | 0.11         |
| Mean rfMRI     | r2        |           | 0.27        | -0.18        | 0.14         |
| PC1            | r2        |           | -0.019      | -0.008       | 0.037        |
| PC2            | r2        |           | 0.006       | -0.01        | -0.035       |
| PC3            | r2        |           | 0.03        | 0.01         | 0.006        |
| PC4            | r2        |           | 0           | 0.001        | -0.008       |
| PC5            | r2        |           | 0.007       | -0.004       | 0.011        |
| PC6            | r2        |           | -0.006      | 0.008        | -0.008       |
| PC7            | r2        |           | 0.003       | -0.004       | 0            |
| PC8            | r2        |           | 0.007       | 0.005        | 0.005        |
| PC9            | r2        |           | 0.005       | 0.007        | -0.012       |
| PC10           | r2        |           | 0.007       | -0.008       | 0.004        |
