# Supplementary material for: Genome-wide association study of MRI markers of cerebral small vessel disease in 42,310 participants
Source: PubMed Central journal article supplement (PMC7195435; doi:10.1038/s41467-020-15932-3), 2020-05-01
Supplement: 41467_2020_15932_MOESM12_ESM.pdf [file 41467_2020_15932_MOESM12_ESM.pdf]

**Title:** Supplementary Data 1.

**Description:** GWAS meta-analysis association loci for WMH.

**Title:** Supplementary Data 2.

**Description:** GWAS association results for FA.

**Title:** Supplementary Data 3.

**Description:** GWAS association results for MD.

**Title:** Supplementary Data 4.

**Description:** Genetic correlation results for WMH, FA and MD.

**Title:** Supplementary Data 5.

**Description:** Significant genetic correlations with and without stroke cases from the third GWAS study.

**Title:** Supplementary Data 6.

**Description:** HyprColoc results.

**Title:** Supplementary Data 7.

**Description:** PhenoScanner annotations.

**Title:** Supplementary Data 8.

**Description:** TWAS associations results for WMH, FA and MD.

**Title:** Supplementary Data 9.

**Description:** UK Biobank field codes to derive output phenotypes
